# Supplementary material for: U-Pb dating of chrysocolla from supergene copper deposits in the Coastal Cordillera of northern Chile, Atacama Desert
Source: Copernicus journal article supplement (doi:10.5194/egusphere-2025-4801), 2025-10-14
Supplement: Supplementary file 1 [file Data U-Pb samples.xlsx]

## Sheet: Sequence 6
Grain	Sample	207Pba (cps)	Ub (µg/g)	Pbb (µg/g)	Thb/U	238Uc/206Pb	±2s (%)	207Pbc/206Pb	±2s (%)	rhod
U006	CC22-03-07a	14672.7	96.3434	0.225029	0.0009008	1351.42	4.37761	0.795379	1.89519	4.28223e-16
U007		15824.3	122.13	0.239466	0.000116771	1610.54	3.03608	0.781767	1.60399	3.64767e-16
U008		12988.8	67.1518	0.192789	0.00178619	1143.75	3.95478	0.78514	1.92645	2.33158e-16
U009		14329.7	142.058	0.215761	0.00014658	2084.75	2.93418	0.787128	1.7204	0
U010		14182.4	132.644	0.23079	0.000165682	1721	3.89681	0.788441	1.77537	-2.56763e-16
U011		11515.4	120.534	0.173878	0.000911477	2165.62	2.88814	0.778666	1.8383	-3.34577e-16
U012		11184.8	123.583	0.168749	0.00080668	2284.58	2.89156	0.77624	1.93309	0
U013		12670.4	125.889	0.35568	0.000824546	2090.87	3.73817	0.791053	2.88049	0
U014		18532.6	121.269	0.229832	0.00119569	2161.97	2.99733	0.792355	2.03741	0
U015		13604.1	112.456	0.20626	0.00223645	1734.25	2.90839	0.787233	1.72731	0
U016		12887.5	105.483	0.195155	0.00196052	1746.42	2.91494	0.799556	1.76751	0
U017		12311	101.789	0.188967	0.00174245	1695.64	3.04689	0.777991	1.86919	0
U018		13997.6	94.4732	0.210817	0.00250256	1435.94	3.01843	0.798983	2.29927	-2.55953e-16
U019		15634.8	55.9385	0.291168	0.00742894	759.778	3.07556	0.799782	2.18226	0
U020		15599.9	46.4182	0.259806	0.00825449	637.278	4.76917	0.801584	1.93934	0
U021		17119.6	47.907	0.267433	0.0096552	587.419	4.55925	0.803969	1.65595	-4.70564e-16
U022		14221.5	60.3418	0.218988	0.00356681	872.099	4.77763	0.795305	1.69619	4.38404e-16
U023		14994.7	47.5241	0.229496	0.00777033	666.557	4.3007	0.79984	1.81525	0
U024		14149.3	38.3609	0.214973	0.00727736	567.863	3.03409	0.793762	1.70825	-3.42728e-16
U025		14557.9	34.8905	0.216092	0.00733651	531.52	3.10027	0.803931	1.80737	0
U026		14384.3	27.6182	0.318033	0.0100832	412.483	3.84628	0.802563	1.75864	0
U027		15110.4	43.2462	0.23149	0.00650873	596.206	4.75196	0.800292	1.78765	4.18221e-16
U028		14275.1	35.9181	0.215174	0.0070176	536.567	3.16381	0.808996	1.86985	-3.0027e-16
U029		13435.9	17.3526	0.201464	0.0129284	275.786	3.11999	0.802562	1.7135	-3.32272e-16
U030		12878.9	14.9483	0.194127	0.0106483	249.027	2.97086	0.80305	1.7442	0
U031		11935.5	14.8158	0.181404	0.00654357	267.016	2.90302	0.807654	1.76716	3.46261e-16
U032		16453.7	105.653	0.249555	0.00435581	1341.29	3.64726	0.787242	1.73208	-2.81187e-16
U033		19232.6	86.4298	0.292733	0.00690607	960.901	4.85431	0.799793	1.4686	0
U034		11559.8	126.088	0.173093	0.0001871	2342.95	2.89031	0.805193	1.82433	3.36885e-16
U035		10882.6	122.047	0.165182	0.00021353	2342.88	2.91964	0.786871	2.07501	-2.93211e-16
U036		11566.4	114.132	0.171301	0.000229566	2166.12	3.0329	0.817222	1.84314	0
U037		11579.5	89.141	0.175493	0.000115212	1632.28	3.12098	0.791808	1.92044	-2.96373e-16
U038		11921.4	68.256	0.178081	0.000111266	1234.56	3.6321	0.805106	1.85141	0
U039		11777.5	42.2852	0.17708	0.000232371	768.234	3.62595	0.790885	1.8437	-2.65716e-16
U040		12776.6	29.2745	0.192147	0.000407491	493.049	4.0031	0.796007	1.96047	0
U041		11775.7	10.0174	0.178073	0.000487006	179.374	2.88027	0.790049	1.86412	0
U042		11680.1	5.38498	0.177921	0.000282038	96.0513	3.79341	0.79758	1.89311	-2.47357e-16
U043		12019.2	9.53471	0.180263	0.000831628	169.833	3.03292	0.805636	1.85795	0
U044		11496.4	6.80711	0.176515	0.00129635	123.938	3.74606	0.791697	2.02448	0
U045		11955.7	8.83034	0.182119	0.00138814	154.534	3.28507	0.787931	1.91289	-2.82681e-16
U046		11777	16.0452	0.176096	0.000603001	290.06	2.95256	0.798546	1.90031	-3.16597e-16
U047		11424.1	21.0069	0.172103	0.000887636	391.287	3.0444	0.805427	1.85855	-3.13945e-16
U048		11408.3	18.6387	0.172876	0.00150739	344.205	3.19565	0.790133	1.97825	0
U049		11741.6	15.4544	0.177433	0.00198238	279.434	3.05404	0.80096	1.92802	3.01678e-16
U050		11414.3	12.2162	0.173744	0.00212827	226.41	3.16189	0.798245	1.95503	2.87362e-16
U056		13962.6	9.67718	0.225103	0.00483906	159.887	4.30743	0.803416	2.64112	0
U057		11835.1	12.606	0.178112	0.00250347	228.548	3.54335	0.807847	1.94	-2.58412e-16
U058		11584.9	16.719	0.175323	0.00364694	307.071	3.5835	0.802636	1.99922	-2.47949e-16
U059		11853.6	21.4041	0.179557	0.00180973	388.979	3.47244	0.812659	1.92603	0
U060		11491.1	69.2602	0.176279	0.000241394	1260.82	2.90471	0.774112	1.80588	3.38641e-16
U061		11915.2	70.2248	0.178833	0.000364712	1241.03	2.87234	0.782899	1.84777	0
U062		11517.8	79.4863	0.174406	0.000178946	1428.4	2.86112	0.770449	1.85802	0
U063		11837.8	76.5766	0.213117	0.000107852	1369.63	2.91451	0.785388	1.85909	0
U064		12069.7	82.1881	0.178531	0.00011394	1484.41	2.88743	0.805745	1.69053	0
U065		12491.6	81.9469	0.188203	0.000126607	1407.84	2.9258	0.786898	1.71389	0
U066		12036.3	86.113	0.180027	0.000210613	1537.81	2.85438	0.795074	1.81529	0
U067		12431.5	78.0411	0.186446	0.000374068	1332.25	2.90008	0.790047	1.77519	0
U068		12232.3	81.8928	0.183721	0.000282048	1436.49	2.87489	0.793727	1.768	-3.49483e-16
U069		12269.4	84.6893	0.183185	0.00064244	1487.72	2.84558	0.799087	1.70787	0
U070		12347.4	83.9745	0.185017	0.000583017	1444.39	2.8356	0.787108	1.67157	0
U071		10574.4	72.1574	0.158366	0.000285396	1455.24	3.25433	0.792721	2.54301	0
U072		12574.7	90.1973	0.188314	0.000447288	1540.2	2.91273	0.796189	1.8327	3.32767e-16
U073		12304.7	100.97	0.18536	0.00060513	1751.51	2.97484	0.791464	1.8104	-3.29832e-16
U074		12987.6	108.224	0.19262	0.00063426	1803.18	2.86653	0.802687	1.68633	3.67478e-16
U075		12950.4	119.495	0.193791	0.000717697	1990	2.88469	0.797387	1.69115	0
U076		12380.6	91.6929	0.185112	0.000547658	1624.42	2.91116	0.79279	1.78334	-3.42161e-16
U077		12878.8	78.6132	0.193262	0.000236372	1300.94	2.88663	0.7974	2.11071	0
U078		12614.9	76.0593	0.188862	0.000366524	1291.09	2.85836	0.794405	1.71371	3.62642e-16
U079		12198.7	87.4324	0.182182	0.000171223	1554.84	2.93601	0.803542	1.68938	0
U266	CC2-3	3056.18	5.18232	0.0553438	0.0002826	257.369	3.71071	0.644177	3.84773	-1.24414e-16
U267		3294.08	6.18644	0.0675335	0.000177496	278.706	3.88817	0.62426	4.39274	3.12011e-16
U268		3316.08	6.54224	0.0613322	0.000238596	281.412	3.34548	0.597368	3.74615	-2.83476e-16
U269		3294.8	6.51189	0.0591426	0.000195247	290.405	3.5404	0.609452	3.75209	-2.67445e-16
U270		2837.2	6.71522	0.0534593	0.000292957	322.117	4.01702	0.564151	4.03933	4.37902e-16
U271		4006.42	6.09209	0.068432	0.000208247	251.185	4.03948	0.647363	3.20413	0
U272		4607.13	6.90136	0.0811348	0.000213976	241.081	5.61239	0.655279	4.72689	0
U273		4047.87	7.15113	0.0723286	0.000184643	265.46	3.78451	0.636732	4.71751	-1.98993e-16
U274		2939.17	6.349	0.0540692	0.000167725	309.906	3.42025	0.600244	3.43563	3.0234e-16
U275		3120.47	6.57501	0.0584888	0.000174954	293.742	3.61378	0.580264	3.61896	-1.35826e-16
U276		1541.54	3.02502	0.03037	0.000200472	252.831	5.38145	0.604392	6.33351	-4.16943e-16
U277		3463.63	5.61935	0.0628678	0.000204311	256.065	3.40117	0.643679	3.58126	-1.45836e-16
U278		3555.62	6.03054	0.0649074	0.000214757	257.118	3.37427	0.631827	3.41188	0
U279		3526.35	6.84658	0.0650016	0.000205495	280.021	3.43594	0.619122	3.06171	0
U280		3204.43	7.10592	0.0605008	0.000240137	301.142	3.31984	0.572423	3.60952	-1.48239e-16
U281		3489.98	7.83885	0.065095	0.000170946	309.547	3.28983	0.577528	3.07742	-1.75457e-16
U282		2979.95	6.54844	0.0557714	0.00026493	300.079	3.79657	0.579628	4.12589	1.13402e-16
U283		3196.06	6.50679	0.0573346	0.000175282	298.945	3.43988	0.586411	3.43447	-3.00717e-16
U284		3121.57	5.85729	0.0557402	0.000217715	286.158	3.86076	0.617583	3.6755	1.25182e-16
U285		3372.82	6.63853	0.0595373	0.000180922	295.377	4.02533	0.597876	4.00778	0
U286		3760.74	6.02313	0.0642985	0.000115903	281.729	4.53203	0.616367	4.11383	0
U287		5513	18.229	0.103668	8.11152e-06	443.447	3.258	0.56515	3.27578	-1.66443e-16
U288		4230.36	12.1323	0.08185	2.33509e-06	352.421	3.33189	0.5195	3.59727	-1.48206e-16
U289		4185.3	10.2102	0.0788691	6.97772e-06	323.758	3.18005	0.557642	3.15938	0
U290		4476.47	11.8775	0.0848084	8.12635e-07	348.082	3.54985	0.55123	3.7218	0
U291		3311.15	7.96589	0.0601801	4.87138e-06	347.493	4.52571	0.578303	4.26898	0
U292		5448.91	14.5621	0.102491	8.91732e-06	354.39	3.2081	0.553187	2.66186	0
U293		4875.65	14.1638	0.0913084	5.21308e-06	369.516	3.47798	0.536637	2.80904	0
U294		4287.41	10.9694	0.0801906	3.4173e-06	330.561	3.61241	0.540697	3.1714	-3.10107e-16
U295		4316.67	9.23264	0.0800665	1.38839e-05	284.977	3.81731	0.548485	4.08443	0
U296		3814.62	9.99602	0.0749762	1.12718e-05	314.202	3.24497	0.512381	3.3086	0
U297		3359.29	10.1038	0.0666558	1.92999e-06	346.64	3.49434	0.488796	3.99802	1.27151e-16
U298		4843.93	10.8618	0.0909592	8.16449e-06	294.22	3.82342	0.526495	3.65139	-1.27239e-16
U299		4547.45	12.7384	0.0860126	7.25173e-06	362.534	3.26004	0.535242	2.94293	-1.85152e-16
U300		4962.62	14.0738	0.0958051	3.0616e-06	350.712	3.35858	0.515207	2.80207	-1.88754e-16
U306		7011.28	6.68372	0.125776	3.83159e-05	155.704	3.38265	0.693081	3.18902	1.6467e-16
U307		9609.62	11.7813	0.16864	2.07849e-05	194.264	3.77992	0.649726	2.62554	0
U308		4990.43	7.44616	0.0900821	1.993e-05	227.564	3.3277	0.649393	2.83333	0
U309		10582.3	12.8684	0.190232	1.78752e-05	189.241	2.87618	0.667755	1.90014	3.25034e-16
U310		8553.01	11.2808	0.151571	1.43576e-05	212.98	3.0589	0.683214	2.42542	0
U311		7289.77	10.3281	0.130418	1.87608e-05	224.666	3.04628	0.667387	2.34474	0
U312		9937.65	13.7121	0.176588	1.85112e-05	215.586	2.92719	0.657548	1.88306	0
U313		11127.3	15.6007	0.20007	1.3558e-05	225.86	3.01221	0.682948	2.22866	0
U314	CC2-3 Botryoidal	63774.7	104.35	1.09022	2.27209e-06	316.452	2.68147	0.813167	0.85332	0
U315		74645	125.86	1.27582	2.46153e-06	327.796	2.68361	0.821906	0.804074	4.1161e-16
U316		66346.6	123.523	1.12864	1.41022e-06	363.254	2.66515	0.821077	0.86031	0
U317		70232.2	122.692	1.18739	2.08543e-06	345.702	2.73703	0.817675	0.870058	0
U318		93071.4	149.154	1.5921	1.57069e-06	309.14	2.7534	0.826796	0.738124	0
U319		92847.5	128.132	1.57706	2.86982e-06	272.989	2.79481	0.825383	0.782257	4.06255e-16
U320		77011.6	115.538	1.31179	5.24062e-06	297.012	2.63771	0.823978	0.812767	0
U321		84215.5	117.665	1.4364	1.14409e-05	273.867	2.7229	0.82446	0.765094	-4.26338e-16
U322		86720.8	120.31	1.46228	9.23789e-06	279.131	2.65624	0.824074	0.754808	0
U323		89297.3	104.144	1.51548	2.05608e-05	230.889	2.65549	0.828505	0.755157	-4.42913e-16
U324		69275.1	108.116	1.18294	3.29218e-06	304.224	2.72002	0.82476	0.859363	3.79972e-16
U325		90598.4	115.612	1.55388	3.54001e-06	246.497	2.67447	0.831709	0.74597	-4.45186e-16
U326		90540.8	112.573	1.55264	5.43868e-06	241.012	2.62748	0.825161	0.718468	0
U327		83800.3	118.683	1.44192	8.04759e-06	271.488	2.63975	0.82253	0.771875	0
U328		76871.7	106.184	1.32809	1.08623e-05	261.868	2.67902	0.813146	1.02869	0
U329		85983.5	118.608	1.47221	1.3551e-05	265.706	2.74343	0.824724	0.809801	0
U330		73719.5	110.646	1.26887	1.50285e-05	286.942	2.62254	0.814937	0.80844	0
U331	MA22-01-01b	3934.29	7.58231	0.0429121	3.14667e-06	506.954	4.18384	0.677519	3.89626	2.1794e-16
U332		3883.16	9.17253	0.041946	2.4159e-06	644.051	3.64602	0.691383	3.28909	0
U333		3261.35	10.2843	0.0351029	4.69911e-06	862.764	3.81752	0.701163	3.88729	0
U334		3894.42	8.9198	0.0405211	8.06886e-06	680.089	3.68257	0.676975	3.48675	1.38343e-16
U335		4265.3	8.77909	0.0463729	1.28372e-05	562.123	3.32328	0.662017	3.32902	0
U336		4413.3	9.3356	0.0475302	2.73228e-05	589.737	3.34497	0.697487	3.14479	-3.37735e-16
U337		4376.07	8.01736	0.0477405	4.44994e-06	495.242	3.79334	0.684513	3.04524	-1.53775e-16
U338		3457.58	9.0764	0.0390086	-2.52761e-06	714.795	3.61234	0.693393	3.58096	-2.74645e-16
U339		3180.18	8.95514	0.0352018	2.45353e-06	731.896	3.64636	0.669828	3.99342	1.2199e-16
U340		3042.15	9.21004	0.0337356	3.46935e-06	800.09	3.80351	0.673796	4.53275	-1.03035e-16
U341		3137.35	8.88566	0.035286	1.93037e-05	732.444	3.80484	0.662967	4.32868	0
U342		3456.94	8.88744	0.0381444	0.000132786	694.415	3.5848	0.692076	3.64125	1.36086e-16
U343		4332.7	8.79548	0.0478573	0.000336591	535.143	3.28837	0.673422	3.20097	-1.68759e-16
U344		4731.52	8.01336	0.0533278	6.51804e-05	441.198	3.2524	0.673483	2.85243	-1.91474e-16
U345		4370.51	8.37067	0.047391	4.24445e-05	521.843	3.24174	0.700707	3.11479	1.75923e-16
U346		3936.97	9.2249	0.0427011	4.56111e-05	644.234	3.76708	0.687863	3.35612	0
U347		3468.11	9.45387	0.0382168	0.000163958	753.995	3.45421	0.686847	3.4245	-1.5017e-16
U348		3853.4	9.10884	0.0412844	2.07111e-05	672.255	3.59133	0.692416	3.27675	0
U349		3483.6	10.7505	0.0385249	1.21883e-05	825.654	3.41608	0.682099	3.49492	-2.97573e-16
U350		3277.55	10.3949	0.0364688	2.22637e-05	846.15	3.54002	0.690397	3.92222	0
U356		4501.52	7.86524	0.0508642	4.61352e-05	450.587	3.25614	0.672058	2.94648	-3.703e-16
U357		4511.99	8.12922	0.0501077	8.66712e-05	475.371	3.1832	0.693633	2.83744	-3.93342e-16
U358		4472.71	8.37967	0.0492279	0.000112246	492.414	3.23287	0.680948	2.91762	-1.88327e-16
U359		4480.56	7.70892	0.0489981	0.000113927	466.332	3.41665	0.668428	2.98079	1.74421e-16
U360		5438.64	7.09316	0.0607762	5.34573e-06	341.236	3.3334	0.690657	2.47251	-2.15529e-16
U361		5655.38	6.92615	0.0630647	5.76416e-05	328.165	3.14669	0.69386	2.6805	0
U362		4305.52	8.59336	0.0478694	0.000468651	532.909	4.32349	0.680098	3.22705	-2.54636e-16
U363		3852.34	9.4642	0.0425481	0.000380349	654.4	5.09273	0.683708	3.3885	0
U364		3637.64	8.34249	0.0407246	0.000259282	588.682	4.62985	0.684022	3.61491	0
U365		5193.7	7.09376	0.0567836	0.000170436	370.219	3.49495	0.696768	2.74891	-1.84896e-16
U366		4601.05	7.44415	0.0518943	0.0011482	412.268	3.11157	0.662233	2.99588	0
U367		4482.54	4.99664	0.0486226	0.000361371	309.598	3.38084	0.694187	3.26555	1.60898e-16
U368		4845.51	4.83966	0.0499817	0.00174996	305.106	3.56502	0.699125	3.11998	0
U369		9692.5	4.74763	0.0925909	0.000883444	188.549	10.0454	0.692303	2.27204	0
U370		4964.9	4.75081	0.0514563	0.0017797	292.035	3.48535	0.697625	2.98439	0
U371		4908.2	4.59806	0.0516026	0.00215662	291.544	3.50277	0.709688	3.0152	-1.68191e-16
U372		4712.15	4.71152	0.0501931	0.00209954	284.959	3.47004	0.689243	3.06636	0
U373		7229.05	4.72295	0.0669891	0.00182041	255.751	5.88236	0.686449	2.64622	0
U374		6486.73	4.97312	0.0620762	0.000711113	294.859	3.52124	0.698447	2.78442	3.62351e-16
U375		6683.26	4.80058	0.0615368	0.00109983	282.021	3.79656	0.71386	2.70237	0
U376		4460.6	3.88463	0.0484028	0.00116269	242.747	3.25528	0.686497	2.95514	3.69313e-16
U377		5514.07	4.46294	0.0545382	0.000580103	269.715	3.76386	0.705476	2.99431	1.57616e-16
U378		5225.83	4.60927	0.0542769	0.000172156	280.672	3.37862	0.701763	2.93097	-1.79382e-16
U379		4744.8	4.20452	0.049424	0.000704927	263.184	3.34856	0.708867	3.00768	-1.76377e-16
U380		4744.96	3.71993	0.0498609	0.00105635	226.567	3.3322	0.712505	3.15013	3.38455e-16
U381		4239.5	3.20484	0.0458589	0.00178372	209.228	3.6711	0.682371	3.29334	0
U382		4436.89	3.41881	0.0495364	0.00233282	198.972	3.44966	0.67058	3.67314	-1.4019e-16
U383		4742.93	3.46841	0.0519307	0.00150841	202.505	3.31158	0.701807	2.94526	1.82125e-16
U384		4703.76	3.83399	0.0515528	0.00142764	223.959	3.2653	0.689999	2.95422	1.84147e-16
U385		4563.71	3.79979	0.0526827	0.000915081	224.924	3.21811	0.692453	3.09125	0
U386		4805.83	3.43826	0.0528403	0.00146645	193.946	3.11223	0.702432	2.85425	1.99971e-16
U387		4676.41	3.20281	0.0530346	0.00123099	181.964	3.26308	0.697468	3.60447	-1.51029e-16
U388		5845.41	3.23554	0.0599558	0.00300738	178.516	3.47814	0.712757	3.07972	1.65833e-16
U389		5148.01	3.6623	0.0552975	0.00125849	205.637	3.47886	0.686388	3.17388	0
U390		6475.49	3.97822	0.0854923	0.00104148	216.749	3.57982	0.691415	2.93095	0
U391		4975.36	4.15021	0.0532969	0.000813471	235.159	3.42261	0.697181	3.00267	0
U392		4872.5	4.07287	0.0533217	0.000690739	234.989	3.20118	0.699614	2.88392	-1.92414e-16
U393		4582.79	3.8985	0.050151	0.000743301	231.166	3.26545	0.680335	3.15211	1.72578e-16
U394		4788.02	3.9652	0.0516151	0.000915798	233.802	3.34948	0.689496	2.93035	-1.80981e-16
U395		5111.1	4.31911	0.053383	0.000702571	259.191	3.35198	0.717312	3.12791	-1.69424e-16
U396		4754.44	4.73608	0.0518492	0.000897182	271.621	3.2795	0.69987	2.96862	0
U397		4944.87	2.47361	0.0581521	9.64629e-06	136.761	3.20136	0.71854	3.02495	-1.83433e-16
U398		4969.77	2.50479	0.0571111	0.00015088	134.144	3.26874	0.703739	2.92987	0
U399		5122.77	2.28972	0.064589	5.58716e-06	122.655	3.21043	0.7064	3.0619	0
U400		5110.59	2.27399	0.0557727	3.46511e-05	124.867	3.28306	0.704611	2.93346	1.84447e-16
U406		4879.94	2.64835	0.0548512	0.0011546	143.582	3.2525	0.697204	2.9868	-1.82855e-16
U407		4953.4	2.3349	0.0566679	0.000626324	125.942	3.6366	0.701724	3.25872	-1.49895e-16
U408		5266.16	2.38098	0.0585974	0.00022117	123.489	3.43812	0.683999	2.67203	1.9336e-16
U409		5179.56	3.09348	0.0584154	0.000198485	161.99	3.32388	0.696387	2.91171	3.67085e-16
U410		5276.58	2.86436	0.0592462	0.00493475	145.292	3.18193	0.694758	2.87048	0
U411		5478.31	2.59407	0.0615284	0.00118238	125.38	3.13244	0.688475	3.05487	0
U412		5624.04	2.03746	0.0637703	2.47901e-05	98.4731	3.24325	0.704974	2.76249	0
U413		5507.34	2.67983	0.0606061	0.00252902	131.846	3.19943	0.70879	2.8687	-1.93541e-16
U414		5084.79	1.68734	0.0542254	0.00011779	95.649	3.32902	0.709072	2.92409	1.82483e-16
U415		5802.48	1.63795	0.0601325	3.43854e-05	84.7215	3.39649	0.718062	2.82488	1.8514e-16
U416		5463.29	1.67334	0.0609804	0.000195352	81.0878	3.2306	0.692724	2.72496	0
U417		5819.17	2.03465	0.0638485	0.00160743	94.8245	3.18839	0.70306	2.5879	2.15284e-16
U418		5371.17	2.4132	0.0595819	0.000197606	118.523	3.14298	0.699829	2.78676	-4.05619e-16
U419		5358.09	2.37167	0.0605214	4.17669e-05	116.994	3.23098	0.690971	2.81031	0
U420		5768.85	2.66913	0.0649872	0.00073312	121.7	3.30318	0.691004	2.67695	2.0089e-16
U421		6851.66	2.89791	0.0754242	0.00538647	116.652	3.21471	0.721548	2.39709	4.61035e-16
U490	MA22-01-04a	3036.18	15.5641	0.0522232	0.00019815	875.2	3.49992	0.682558	3.71865	-1.36486e-16
U491		3541.84	15.6269	0.0608327	0.000518571	765.075	3.50066	0.697172	3.62627	0
U492		3022.23	14.6924	0.0527245	0.000395454	831.159	3.708	0.687995	4.29143	1.11632e-16
U493		3174.95	17.5537	0.0537591	0.000394158	963.2	3.76616	0.693027	3.55376	-1.32722e-16
U494		3824.05	17.9971	0.0643909	0.0016685	842.945	3.30618	0.724522	3.29929	1.62848e-16
U495		3791.27	16.3143	0.0631382	0.00643445	782.764	3.67706	0.70923	3.19993	0
U496		4533.59	13.4879	0.0768355	0.0100918	530.164	3.33401	0.715182	3.31606	-1.60673e-16
U497		5741.11	16.2212	0.0947578	0.00653886	537.802	4.06013	0.747467	2.7129	-3.22541e-16
U498		6971.34	16.6438	0.114837	0.00555664	470.105	3.28707	0.792171	2.90897	1.85773e-16
U499		4184.26	16.5756	0.0697887	0.00192357	738.853	3.49703	0.731466	3.28259	1.54744e-16
U500		4015.59	16.9684	0.0648642	0.000996332	847.429	3.66691	0.731949	3.37926	-1.43354e-16
U506		5623.18	13.9958	0.0913194	0.00263523	494.745	3.4135	0.749851	3.1366	0
U507		4037.17	17.3257	0.0683853	0.000887437	768.972	3.35084	0.713548	3.3241	-1.59479e-16
U508		4856.17	18.8167	0.0838411	0.00034926	696.541	3.24014	0.724738	3.24633	1.68878e-16
U509		3648.12	18.6544	0.0622596	0.000467984	905.768	3.43442	0.716294	3.42106	0
U510		3001.09	17.6074	0.0526491	0.000864282	973.785	3.43969	0.669855	3.67306	0
U511		3066.53	18.308	0.0523681	0.0010072	1034.95	3.42888	0.68697	3.79164	-1.36631e-16
U512		2887.93	17.9449	0.0500436	0.00189551	1034.69	3.56009	0.675461	3.81059	-1.30941e-16
U513		3253.41	14.3208	0.0553728	0.00197945	766.346	3.56171	0.700399	3.83909	1.2991e-16
U514		4170.16	17.5753	0.0704786	0.00070557	766.972	3.34403	0.744325	3.23087	-1.64415e-16
U515		3948.38	13.1448	0.0693725	0.00114457	571.309	3.52935	0.693836	3.69862	1.3608e-16
U516		3603.72	17.4373	0.0608071	0.000718329	862.953	3.4273	0.719211	3.29427	1.57333e-16
U517		4261.16	13.0157	0.0713333	0.00426749	572.23	3.93467	0.732589	3.62056	-1.24694e-16
U518		3246.86	17.6077	0.0557904	0.00270824	950.444	3.48829	0.702492	3.73283	1.3642e-16
U519		3418.92	14.2565	0.0588056	0.00243597	737.055	3.46392	0.71564	3.55702	1.4417e-16
U520		3545.48	16.8256	0.0610361	0.0020857	811.985	3.40801	0.699984	3.42593	3.04285e-16
U521		4553.37	17.9696	0.0763064	0.00243667	737.45	3.71173	0.754928	3.97872	0
U522		5159.1	13.9603	0.0869797	0.00201617	507.838	4.19705	0.756114	4.68553	1.80658e-16
U523		6756.46	15.9967	0.111624	0.00366704	451.546	3.05048	0.768677	2.55452	0
U524		6121.08	16.4114	0.102553	0.00617138	498.831	3.71773	0.770372	2.51381	-1.90073e-16
U525		6520.72	18.287	0.280319	0.00211052	530.465	3.16931	0.769548	2.74387	2.04268e-16
U526		6870.24	18.4408	0.116118	0.00184006	498.905	3.6197	0.75275	3.71834	0
U527		2988.15	15.4975	0.0518517	9.66242e-05	902.56	3.77841	0.692947	3.75048	1.25353e-16
U528		3059.37	15.2547	0.0530827	0.00310105	840.023	3.47425	0.695691	4.02376	1.27068e-16
U529		2786.75	17.3264	0.0486029	0.000101262	1055.67	3.59304	0.68635	4.08845	0
U530		2837.72	16.4629	0.0507787	0.000176694	973.253	3.76387	0.688255	4.52482	-2.08605e-16
U531		3536.8	16.4045	0.0593431	6.89901e-05	843.573	3.60203	0.722465	3.422	-2.88226e-16
U532		2813.43	16.5945	0.0487629	1.66327e-05	1000.62	4.95357	0.699817	3.94109	0
U533		2818.47	14.1475	0.0504365	3.385e-05	828.532	3.60026	0.665186	3.91199	1.26124e-16
U534		2806.25	14.1302	0.0486668	5.95258e-05	845.411	3.4069	0.67989	3.7953	0
U535		2963.78	15.6908	0.0494923	6.59995e-05	954.993	5.33855	0.684483	3.84875	1.72909e-16
U536		2739.53	16.8811	0.0476231	0.000114353	1040.11	4.06316	0.684822	4.1848	0
U537		2802.35	10.4052	0.0487475	0.000364143	612.054	4.14066	0.673702	4.67863	0
U538		2361.76	19.2519	0.0417017	2.32872e-05	1336.54	3.69801	0.667581	4.76508	0
U539		2695.95	14.0979	0.0459216	0.000179938	900.117	3.58316	0.70693	4.52304	2.19211e-16
U540		4335.78	12.0492	0.0623776	0.00025398	698.446	5.92666	0.703203	3.4102	0
U541		2718.32	15.4592	0.0462265	0.000112067	989.274	4.19268	0.684289	3.92056	2.16133e-16
U542		2768.17	15.4006	0.0486875	0.000146468	936.496	4.00792	0.666594	3.85704	2.29819e-16
U543		2637.45	16.2276	0.0473349	7.90675e-05	986.94	4.45913	0.667634	4.05108	0
U544		2635.01	20.3561	0.0461743	3.4886e-05	1267.03	3.61945	0.681522	4.34003	-1.13082e-16
U545		2956.03	14.2873	0.0504295	0.000290745	864.229	3.82954	0.688204	3.87369	2.39491e-16
U546		3035.51	14.4226	0.0525529	0.000456674	808.452	3.71405	0.688273	3.96756	-1.20548e-16
U547		3004.26	16.8652	0.0509923	0.00029672	970.532	3.94169	0.697713	3.84822	-1.17108e-16
U548		2742.42	19.9262	0.0491218	6.07295e-05	1188.05	3.66646	0.667747	4.25433	0
RM0
A001	Nist612	1.41908e+06	36.1535	37.0837	1.00878	3.45	0.192307	0.9068	0.121465	0
A002	Nist612	1.4523e+06	37.0763	37.8151	1.00438	3.477	0.191086	0.9079	0.140772	0
A051	Nist612	1.50223e+06	38.3243	38.7	1.01853	3.507	0.210761	0.908	0.131425	-2.50508e-16
A052	Nist612	1.51256e+06	38.6468	38.8854	1.01481	3.528	0.200923	0.9072	0.104642	0
A101	Nist612	1.48588e+06	37.4298	38.194	1.01482	3.46	0.22694	0.9079	0.125057	-4.88993e-16
A102	Nist612	1.50654e+06	37.9977	38.6321	1.01194	3.479	0.202568	0.9062	0.109033	-3.14167e-16
A151	Nist612	1.47884e+06	37.4189	37.9027	1.00585	3.506	0.153302	0.9084	0.121402	-1.86418e-16
A152	Nist612	1.47329e+06	37.055	37.774	1.01002	3.467	0.205671	0.9066	0.149107	-2.26266e-16
A201	Nist612	1.44261e+06	36.836	37.2042	1.01391	3.504	0.198114	0.9068	0.116623	0
A202	Nist612	1.44113e+06	36.6835	37.2527	1.01173	3.483	0.200821	0.9057	0.109646	0
A251	Nist612	1.43904e+06	37.0271	37.581	1.00963	3.485	0.21278	0.9083	0.139322	0
A252	Nist612	1.44323e+06	37.0969	37.6738	1.01172	3.483	0.193718	0.9061	0.121044	0
A301	Nist612	1.45418e+06	37.503	38.3838	1.01037	3.46	0.180279	0.9081	0.121648	0
A302	Nist612	1.46947e+06	37.8159	38.7125	1.00243	3.462	0.178642	0.9072	0.134002	0
A351	Nist612	1.41738e+06	37.0398	37.8137	1.0101	3.478	0.206045	0.9089	0.126889	2.65401e-16
A352	Nist612	1.42308e+06	37.0025	38.0141	1.01544	3.453	0.203035	0.9069	0.131487	2.59918e-16
A401	Nist612	1.40619e+06	37.4097	38.1882	1.01024	3.46	0.184471	0.9073	0.11858	0
A402	Nist612	1.42287e+06	37.9822	38.4185	1.00285	3.522	0.168482	0.9089	0.115038	0
A451	Nist612	1.41111e+06	37.8601	38.4637	1.01545	3.511	0.160729	0.9074	0.140714	-1.53401e-16
A452	Nist612	1.40732e+06	37.7916	38.4887	1.01272	3.495	0.164264	0.9058	0.132328	3.19224e-16
A501	Nist612	1.38162e+06	37.1692	38.0492	1.01546	3.484	0.200645	0.907	0.135268	0
A502	Nist612	1.39244e+06	37.4737	38.3323	1.01731	3.492	0.178916	0.9077	0.13252	0
A551	Nist612	1.37399e+06	37.2639	38.1508	1.01006	3.479	0.189786	0.9054	0.120586	0
A552	Nist612	1.36965e+06	37.0755	37.9745	1.00955	3.487	0.175712	0.9075	0.128505	1.53652e-16
A591	Nist612	1.36395e+06	37.3497	38.0819	1.0075	3.488	0.170585	0.9073	0.133427	-1.52431e-16
A592	Nist612	1.37548e+06	37.3979	38.3891	1.01039	3.462	0.17992	0.9084	0.132469	0
		1.43329e+06	37.38	38.0831	1.011	3.48315	1.20188	0.907296	0.21111	-2.97688e-17
RM1
B003	GJ1	344710	445.476	40.2028	0.0229393	10.25	2.56637	0.06017	0.510156	-6.78389e-16
B053	GJ1	367795	472.387	42.584	0.023172	10.25	2.56952	0.05989	0.508825	-6.79327e-16
B103	GJ1	370630	471.388	42.6088	0.023203	10.23	2.56765	0.06006	0.518582	6.67032e-16
B153	GJ1	367256	466.105	42.2193	0.0232448	10.21	2.56742	0.05996	0.498234	-6.94336e-16
B203	GJ1	362359	463.086	41.8415	0.0232127	10.23	2.56999	0.06021	0.520178	-6.64379e-16
B253	GJ1	361865	468.978	42.2211	0.0231725	10.27	2.57049	0.06014	0.520681	6.63611e-16
B303	GJ1	366624	478.22	43.5459	0.02327	10.15	2.56838	0.05989	0.499301	-6.92595e-16
B353	GJ1	369050	487.494	44.1362	0.0231714	10.21	2.56897	0.06023	0.499547	0
B403	GJ1	364743	488.336	44.2565	0.0231512	10.2	2.56696	0.06029	0.525386	6.58571e-16
B453	GJ1	366361	494.741	45.1248	0.023206	10.14	2.56822	0.06027	0.495466	0
B503	GJ1	359532	488.818	44.88	0.0233355	10.07	2.56713	0.06015	0.499267	0
B553	GJ1	355023	487.958	44.4326	0.0233133	10.15	2.56607	0.06011	0.501232	1.38109e-15
B593	GJ1	352674	486.097	44.1416	0.0233234	10.18	2.56715	0.06047	0.505868	0
		362202	476.852	43.2458	0.0232088	10.1954	1.09695	0.0601415	0.548932	-2.97843e-18
RM2
C004	Ttn Mana	564855	320.27	113.87	4.07712	5.764	2.57871	0.08753	0.47039	-7.32217e-16
C054	Ttn Mana	552182	318.115	113.009	4.116	5.822	2.57219	0.08536	0.452326	0
C104	Ttn Mana	581004	322.56	115.232	4.07267	5.776	2.5685	0.0875	0.442799	7.80932e-16
C154	Ttn Mana	541183	306.369	110.566	4.17567	5.788	2.579	0.08596	0.449683	0
C204	Ttn Mana	654370	307.969	114.791	4.11768	5.646	2.58054	0.09917	3.57992	9.61426e-17
C254	Ttn Mana	1.18504e+06	291.355	132.279	3.93953	4.913	2.63118	0.1689	1.47043	0
C304	Ttn Mana	804109	310.19	124.049	4.25533	5.399	2.58696	0.1193	2.53546	-1.35411e-16
C354	Ttn Mana	577062	330.158	118.547	4.01415	5.706	2.5713	0.08785	0.611887	0
C404	Ttn Mana	572130	335.67	119.738	4.00951	5.77	2.5904	0.08771	0.481966	0
C454	Ttn Mana	554158	333.256	118.491	3.98069	5.752	2.57517	0.08626	0.475319	0
C504	Ttn Mana	544801	320.257	116.196	4.09858	5.709	2.57294	0.08838	0.469228	7.35678e-16
C554	Ttn Mana	559947	331.74	120.73	4.04124	5.617	2.58988	0.08686	0.519017	0
C594	Ttn Mana	614565	321.03	120.613	4.05906	5.527	2.57724	0.09763	0.694911	-4.95925e-16
Anchor						1e-32	2	0.911	1	0
		638878	319.149	118.316	4.07363	5.62992	8.73837	0.09757	47.9541	1.91692e-17
RM3
D005	Mnz Mana	2.87878e+06	15.2714	339.036	0.206282	0.1963	2.73011	0.7821	0.414486	7.84892e-16
D055	Mnz Mana	2.60006e+06	27.1031	301.225	0.195392	0.3874	3.88201	0.7616	0.419079	0
D105	Mnz Mana	2.61728e+06	21.9601	303.479	0.505028	0.3176	3.39381	0.7696	0.417946	-1.25234e-15
D155	Mnz Mana	2.44203e+06	16.186	285.486	0.285521	0.2474	3.7845	0.775	0.414908	-1.13128e-15
D205	Mnz Mana	2.19783e+06	3087.61	7804.73	53.8662	5.778	2.69679	0.0832	1.57944	-2.08521e-16
D255	Mnz Mana	2.85811e+06	4134.41	9947.86	50.5336	5.796	2.67606	0.08444	0.54178	0
D305	Mnz Mana	2.23798e+06	21.9301	271.775	0.214722	0.3589	2.84178	0.7617	0.412681	0
D355	Mnz Mana	2.88378e+06	25.3736	385.111	1.87643	0.3099	2.63224	0.7396	0.443846	0
D405	Mnz Mana	2.30887e+06	19.5682	283.165	0.197729	0.3065	2.65342	0.7694	0.471781	7.09503e-16
D455	Mnz Mana	2.51009e+06	26.5538	311.33	0.256752	0.3692	3.07782	0.7636	0.415143	-1.39024e-15
D505	Mnz Mana	2.72157e+06	21.318	339.753	0.983396	0.2901	2.7677	0.7692	0.41983	0
D555	Mnz Mana	2.49113e+06	3928.31	9826.84	51.8613	5.691	2.63039	0.07921	0.508225	6.64392e-16
D595	Mnz Mana	2.74097e+06	3691.29	9349.14	50.3553	5.604	2.58628	0.09113	1.79056	-1.91794e-16
		2.57604e+06	1156.68	3057.61	16.2567	1.97325	263.398	0.556137	117.747	-1.5503e-16

## Sheet: Sequence 8
Grain	Sample	207Pba (cps)	Ub (µg/g)	Pbb (µg/g)	Thb/U	238Uc/206Pb	±2s (%)	207Pbc/206Pb	±2s (%)	rhod
U167	CC22-06-01	315.664	3.17782	0.0103936	4.36462e-05	919.408	8.05989	0.710323	16.1972	1.08856e-16
U168		285.871	3.2165	0.0107732	8.73736e-06	1042.43	8.48513	0.721876	18.8635	-1.7757e-16
U169		371.117	3.26784	0.0121547	4.25169e-05	938.052	8.90793	0.666967	16.4605	1.93834e-16
U170		255.194	3.02962	0.00960612	2.91472e-05	1058.25	8.69906	0.70326	19.0132	-8.59198e-17
U171		403.803	3.27382	0.0120944	2.11201e-05	922.341	8.37793	0.823753	14.087	1.2041e-16
U172		383.332	3.07561	0.0132559	2.21986e-05	841.491	8.17921	0.777971	15.3752	-2.26005e-16
U173		325.37	3.1011	0.0111616	4.16971e-05	895.939	8.24215	0.757187	18.3124	-2.8246e-16
U174		325.639	2.94369	0.0114937	-1.84732e-05	882.357	8.48562	0.697794	18.829	-2.66827e-16
U175		354.562	3.17433	0.0115952	2.33825e-05	912.762	7.59108	0.823385	15.8789	-4.71582e-16
U176		300.795	2.82846	0.0111875	2.2787e-06	774.458	7.52429	0.639512	18.6779	5.05588e-17
U177		289.004	2.99077	0.011416	9.33164e-06	824.618	7.65752	0.627206	18.8402	9.85023e-17
U178		399.858	3.07261	0.0126393	3.15578e-05	794.11	7.40167	0.796994	15.3754	-1.87307e-16
U179		341.804	2.9958	0.011302	2.3406e-05	824.272	8.01551	0.707496	16.5467	-2.14293e-16
U180		347.086	3.08725	0.0110382	-1.40802e-05	869.275	7.65845	0.735802	16.351	5.67421e-17
U181		358.755	3.03582	0.0114308	3.75614e-05	854.231	8.09399	0.78823	15.913	-2.20667e-16
U182		346.98	3.85726	0.0122077	3.71763e-05	1082.32	7.72591	0.758175	16.0123	-2.29745e-16
U183		435.428	3.99366	0.0129367	1.20622e-05	1029.27	7.7016	0.832514	12.8411	7.18468e-17
U184		346.522	3.72677	0.0121173	1.96452e-06	1038.15	7.95563	0.785408	15.9937	0
U185		316.596	3.13138	0.0109655	1.29056e-05	885.075	8.03712	0.67535	17.9048	-1.97506e-16
U186		330.793	3.41898	0.0122914	1.04758e-05	938.059	7.65571	0.703588	18.0649	-2.05508e-16
U187		702.393	1.70821	0.0225562	9.22251e-05	293.121	7.10626	0.745534	10.5848	-1.88927e-16
U188		1466.14	1.76296	0.0365729	0.000100225	249.07	10.0786	0.79313	9.40795	0
U189		718.926	2.0835	0.0227112	2.46386e-05	331.863	7.49734	0.708631	10.5016	-2.70737e-16
U190		636.728	2.0307	0.0206532	-4.01027e-05	351.113	7.23025	0.78687	10.5729	0
U191		587.598	1.72813	0.0190496	3.96813e-06	314.478	7.33962	0.842294	12.2746	0
U192		597.382	1.71536	0.0191516	0.000391859	305.752	6.71372	0.842432	12.6604	0
U193		740.379	1.82871	0.0218892	0.000616876	305.999	7.18994	0.823935	9.46374	1.04424e-16
U194		513.143	2.31249	0.0170579	5.05139e-05	498.868	6.92985	0.896035	12.4776	-8.21741e-17
U195		592.506	2.39207	0.0189603	5.54942e-05	432.272	6.59308	0.795479	11.5752	9.31047e-17
U196		530.755	2.73207	0.0183544	3.52677e-05	491.465	6.5949	0.733854	12.0414	1.78951e-16
U197		546.866	2.56743	0.0187208	8.09932e-05	482.147	7.07822	0.807782	10.4908	-9.56879e-17
U198		470.269	2.07189	0.0151738	5.1666e-05	469.918	7.64749	0.835178	14.515	1.92032e-16
U199		641.307	2.09064	0.0219384	0.000138897	324.993	6.54535	0.713351	10.3329	-1.05059e-16
U200		682.624	2.11222	0.0215009	0.000432437	321.792	6.78455	0.701415	10.3784	1.00912e-16
U206		531.318	2.67122	0.0180417	0.0295935	481.192	7.54429	0.689476	12.8766	1.46285e-16
U207		488.457	2.67167	0.0152923	0.00259631	567.819	7.33714	0.782945	13.0603	1.483e-16
U208		513.577	2.75361	0.0168135	3.33872e-05	517.561	7.13275	0.686026	12.8364	7.76049e-17
U209		486.354	2.71943	0.0165836	-7.02881e-06	576.896	7.29576	0.753546	13.5459	-2.87589e-16
U210		418.459	2.78314	0.0153402	3.85785e-05	603.795	7.14261	0.751533	14.5745	2.04767e-16
U211		662.952	2.6891	0.0200745	3.85925e-05	503.126	7.90849	0.810901	10.736	2.51058e-16
U212		530.888	2.5876	0.0171679	1.67025e-05	518.625	6.76397	0.856096	12.2222	-3.43796e-16
U213		1096.4	1.35822	0.0249873	8.66514e-05	375.804	12.3776	0.735315	12.7538	-1.80042e-16
U214		589.03	1.54645	0.0147242	0.00283086	492.179	11.3863	0.734899	16.0208	0
U215		500.455	1.49145	0.0130347	0.000135523	476.995	10.6164	0.803416	15.468	0
U216		554.15	1.53208	0.0156128	7.2297e-05	517.884	11.1377	0.75444	17.8706	0
U217		608.451	1.48595	0.0165719	0.000140714	432.903	10.2214	0.721946	14.214	9.78119e-17
U218		284.1	1.75884	0.00959563	9.83901e-05	681.155	9.96111	0.791824	21.9619	1.94878e-16
U219		387.924	1.8113	0.0112277	2.57349e-05	657.124	12.0789	0.684129	18.1173	-2.59752e-16
U220		412.457	2.05936	0.0152039	6.13136e-05	461.238	7.09127	0.745697	14.8779	-2.02044e-16
U221		489.413	1.53729	0.0159112	0.000102043	301.345	6.87652	0.758002	11.9501	-8.64666e-17
U222		863.278	1.17609	0.0245586	0.000187528	169.119	6.38524	0.826224	7.99388	0
U223		490.744	1.66067	0.0171271	7.06277e-05	325.411	6.58786	0.769541	12.8991	1.6723e-16
U224		683.388	1.11646	0.0219916	5.60445e-05	173.714	6.91908	0.787391	10.7818	-3.80989e-16
U225		937.168	0.99768	0.0289558	0.000812598	135.315	7.47273	0.81235	8.34646	-2.27845e-16
U226		515.655	2.93571	0.0177255	0.000117826	542.511	6.23307	0.776179	12.033	9.47355e-17
U227		767.651	2.42919	0.0249823	0.000179348	345.226	6.71356	0.827017	9.537	0
U228		758.058	2.21106	0.0256023	0.000124429	294.988	5.94231	0.760418	8.75802	1.3653e-16
U229		445.096	3.23278	0.0175181	1.90587e-05	607.099	6.62988	0.678335	13.6075	-3.15041e-16
U230		1628.36	3.01924	0.0405687	3.51636e-06	368.014	9.39772	0.838057	6.66076	-2.27025e-16
U231		790.93	2.38584	0.025377	-8.73573e-06	333.549	6.48276	0.828578	8.86605	1.23623e-16
U232		520.013	3.15143	0.0176934	9.9438e-06	617.613	6.34666	0.843197	11.6768	0
U233		605.87	3.26156	0.019953	6.30344e-05	574.187	6.54473	0.801337	10.9043	-1.99126e-16
U234		472.076	3.01616	0.0156938	3.41754e-05	602.979	6.48814	0.770326	12.249	1.78813e-16
U235		436.472	3.21616	0.0168709	3.57877e-05	619.948	6.28974	0.705077	14.2288	7.9394e-17
U236		612.004	3.18605	0.020856	8.05111e-06	545.546	7.07078	0.730761	11.9951	0
U374	PA23-04-07	38196.9	319.379	1.33738	0.00109804	795.486	2.13699	0.829621	1.06674	0
U375		37167.3	312.859	1.3001	0.000910293	803.222	2.1088	0.832391	1.09681	0
U376		37177	323.788	1.30219	0.00106855	830.851	2.08297	0.828559	1.09445	-3.89603e-16
U377		37739.9	346.412	1.3213	0.000117386	873.891	2.13432	0.829968	1.05138	3.95805e-16
U378		38013.8	334.979	1.33285	0.000195044	836.683	2.0717	0.830292	1.09975	0
U379		38476.8	355.396	1.35416	0.001018	869.903	2.09399	0.822739	1.04679	-4.05199e-16
U380		35910.9	332.515	1.26729	0.000874755	875.543	2.12271	0.829147	1.08179	0
U381		34849.2	320.285	1.21924	0.000305096	881.838	2.13988	0.837722	1.25869	3.29756e-16
U382		37231.6	332.065	1.31515	0.00121	840.723	2.12251	0.826597	1.19715	0
U383		35146.6	325.627	1.24854	0.000341638	868.928	2.14461	0.825853	1.15186	-3.59546e-16
U384		34577.1	312.625	1.21184	0.00101884	862.461	2.12772	0.835817	1.20023	-3.47793e-16
U385		35274	314.431	1.24859	0.00198913	843.904	2.10631	0.830666	1.03097	0
U386		33318.7	288.012	1.17888	0.00149789	826.327	2.09159	0.833126	1.15155	-3.68758e-16
U387		33610.7	286.415	1.1962	0.00138734	797.552	2.10505	0.822572	1.08118	-3.90249e-16
U388		34612.5	289.428	1.22024	0.000880893	784.788	2.09945	0.824511	1.13489	0
U389		31043	221.799	1.11633	0.00115455	646.508	3.30496	0.826694	1.12553	0
U390		35066.6	266.35	1.23486	0.000486481	714.102	2.17885	0.832396	1.11318	0
U391		35685.6	284.833	1.26056	0.0013947	752.282	2.10247	0.826968	1.15041	-3.67212e-16
U392		38109.1	308.589	1.34479	0.000683097	764.249	2.13295	0.830933	1.13924	0
U393		38594.9	299.887	1.35738	0.000452422	733.198	2.15606	0.83059	1.00327	4.10603e-16
U394		37255.6	279.712	1.31347	0.00102015	707.318	2.13112	0.822778	1.07683	-3.87032e-16
U395		45933.7	279.503	1.63418	0.00132168	569.917	2.10502	0.820724	1.10921	3.80393e-16
U396		3.939e+06	139.306	138.211	0.00483374	3.41049	2.01983	0.846108	0.477039	0
U397		37842.7	262.152	1.34793	0.00494178	649.156	2.35286	0.82232	1.06033	0
U398		280974	242.969	9.75755	0.00321114	83.7792	5.19581	0.800951	0.538813	0
U399		37093.2	260.756	1.31682	0.00541117	653.603	2.08544	0.813784	1.124	0
U400		43958.3	247.056	1.57296	0.00647652	511.384	2.45067	0.804873	1.00114	0
U406		42877.2	263.252	1.54685	0.00164052	557.562	2.63075	0.812889	1.08289	0
U407		39547.7	262.586	1.41372	0.00214566	619.381	2.12395	0.826939	1.09619	0
U408		37538.1	266.966	1.34026	0.00298094	667.154	2.07344	0.832888	1.08129	-3.96156e-16
U409		38636.1	269.803	1.38014	0.00243371	654.403	2.16503	0.830843	1.0996	3.73079e-16
U410		55050.9	239.27	1.96158	0.00940996	401.186	2.28294	0.815556	1.34515	2.89224e-16
U411		38322.9	272.533	1.37535	0.00274416	664.909	2.04979	0.826659	1.01098	0
U412		36333.4	249.944	1.30306	0.00330438	645.409	2.08429	0.832482	1.16129	0
U413		49586.8	261.099	1.73332	0.00281767	514.139	4.05873	0.826958	0.904943	9.67273e-16
U414		42155.8	282.084	1.50234	0.00158781	623.694	2.10898	0.831384	0.99609	0
U415		139644	262.16	4.82161	0.00348205	189.223	4.20787	0.8348	0.699233	0
U416		37523.5	257.693	1.3471	0.00228927	636.756	2.07247	0.822771	1.12479	-3.81014e-16
U417		43207.9	239.016	1.54873	0.00615118	514.358	2.32253	0.831278	0.992705	0
U418		39061.7	263.821	1.41071	0.00244038	623.994	2.11999	0.821889	1.09512	-3.82563e-16
U419		37855.8	270.698	1.36255	0.00113337	664.473	2.10313	0.823942	1.08358	-3.89738e-16
U420		40646.4	303.613	1.46625	0.000311877	688.113	2.13697	0.824345	0.996218	0
U421		42112.6	283.546	1.50875	0.00137047	623.979	2.16219	0.822081	1.03212	0
U422		39522	265.056	1.43272	0.00313227	609.741	3.3291	0.82566	1.075	0
U423		37712.8	265.417	1.36652	0.000950452	643.147	2.36225	0.823389	1.08467	0
U424		40494	244.05	1.4562	0.00255509	560.244	2.24063	0.831678	0.954724	4.15194e-16
U425		36779.4	255.672	1.324	0.00154155	642.87	2.33832	0.826691	1.12953	0
U426		36489	242.325	1.31076	0.00259592	618.092	2.11393	0.829134	1.13094	0
U427		39416.7	257.584	1.41295	0.00139367	610.995	2.07352	0.833424	1.05625	0
U428		39247.5	246.971	1.40792	0.00188807	581.627	2.17521	0.830179	1.0622	0
U429		38132.8	249.624	1.38297	0.00149585	603.117	2.12656	0.825756	1.06006	0
U430		37610	273.018	1.3634	0.000596552	663.939	2.10992	0.824774	1.01764	0
U431		38220.3	242.966	1.37178	0.00140539	588.595	2.0909	0.827905	1.07592	0
U432		39951	249.27	1.44207	0.0022527	575.549	2.07458	0.824295	1.00654	0
U433		36345.1	241.959	1.32435	0.00215825	615.034	2.33717	0.829556	1.17422	0
U434		39444	254.582	1.43421	0.00275628	591.661	2.10163	0.823129	1.07265	3.9399e-16
U435		38589.1	243.925	1.3912	0.00167151	583.526	2.23658	0.832921	0.974954	0
U436		36565.1	228.326	1.32934	0.00282145	577.495	2.39499	0.835731	1.00958	-3.67329e-16
U437	PA23-01-11	17341.1	47.443	1.40429	0.102707	99.362	2.2437	0.649669	1.49287	0
U438		13189.8	45.3624	1.07407	0.0603435	124.452	3.01798	0.640427	1.77726	3.31179e-16
U439		25470.3	27.7688	2.02346	0.0716844	43.3258	2.71819	0.715889	2.15513	-1.51617e-16
U440		52476.9	32.1469	4.04568	0.407842	25.0676	4.20485	0.723374	1.31272	0
U441		21389.4	38.5986	1.68883	0.194252	69.6488	3.09094	0.684058	1.33492	0
U442		29429.5	26.1649	2.0145	0.486841	47.7389	2.20693	0.689965	1.38946	0
U443		87923.5	30.251	6.85818	0.914335	13.9055	2.58744	0.728154	0.991057	0
U444		23899.9	49.6066	1.91227	0.191202	78.6331	2.72497	0.666138	1.28458	0
U445		20306.5	30.8834	1.61776	0.192856	57.4558	4.6536	0.670424	3.58303	-2.13069e-16
U446		14264.5	49.8738	1.17891	0.12582	123.862	2.69003	0.641465	1.49963	2.2017e-16
U447		19467.1	47.5709	1.56431	0.162396	91.252	5.9456	0.664102	2.33232	0
U448		15794.4	29.3807	1.25415	0.315354	71.4885	3.22584	0.687444	2.31176	-2.38201e-16
U449		26100.4	24.6061	1.97089	0.417675	39.1321	4.64398	0.702485	2.12095	0
RM0
A001	Nist612	565583	36.036	36.2159	1.01007	3.489	0.265894	0.9072	0.188389	0
A002	Nist612	578329	37.2191	37.2331	1.00879	3.491	0.222387	0.9036	0.177647	1.7564e-16
A051	Nist612	608974	38.0906	38.2722	1.01489	3.478	0.232807	0.9068	0.20792	-1.4335e-16
A052	Nist612	617481	38.64	38.8342	1.01215	3.477	0.1976	0.908	0.182148	1.92787e-16
A101	Nist612	600886	37.527	37.5912	1.00927	3.484	0.202149	0.9082	0.189023	0
A102	Nist612	606418	37.6859	37.7355	1.01282	3.491	0.236456	0.9093	0.18636	0
A151	Nist612	613366	38.074	38.2394	1.00917	3.481	0.229761	0.9095	0.197431	0
A152	Nist612	605642	37.5562	37.7158	1.00868	3.485	0.250672	0.9081	0.214466	0
A201	Nist612	589574	36.565	37.142	1.01083	3.458	0.24006	0.9075	0.214547	-1.34725e-16
A202	Nist612	595927	36.6766	37.3684	1.01516	3.447	0.228527	0.9075	0.188205	3.22665e-16
A251	Nist612	581897	36.845	37.2527	1.01129	3.464	0.202704	0.9073	0.156231	-4.3822e-16
A252	Nist612	580177	36.6223	36.9355	1.01292	3.483	0.204547	0.9082	0.22126	0
A301	Nist612	577317	37.4884	37.42	1.00894	3.537	0.220463	0.909	0.233871	-1.34579e-16
A302	Nist612	578402	37.133	37.5153	1.00982	3.5	0.259959	0.9072	0.212639	0
A351	Nist612	568604	37.2701	37.5757	1.00939	3.516	0.233745	0.9055	0.216168	-1.37327e-16
A352	Nist612	569455	37.6068	37.7753	1.00859	3.517	0.248977	0.9043	0.215005	0
A401	Nist612	569883	38.0924	38.9002	1.0096	3.444	0.237484	0.9086	0.227485	-1.28441e-16
A402	Nist612	574452	38.4766	38.9782	1.01253	3.493	0.202415	0.9077	0.203175	1.68724e-16
A451	Nist612	546181	37.4259	37.8911	1.01064	3.498	0.219652	0.9049	0.231265	1.36598e-16
A452	Nist612	536434	36.7215	37.4488	1.01232	3.455	0.241792	0.9053	0.181322	0
A501	Nist612	523370	36.4504	37.1464	1.01154	3.475	0.256342	0.9053	0.183519	2.94999e-16
A502	Nist612	538592	37.6262	38.3283	1.01274	3.469	0.260894	0.908	0.263337	-4.03994e-16
A551	Nist612	536303	37.7894	38.817	1.01312	3.442	0.252648	0.9095	0.230869	0
A552	Nist612	542388	38.4026	39.1074	1.01231	3.477	0.236931	0.9058	0.217128	1.34882e-16
A594	Nist612	522236	37.4108	37.6556	1.00755	3.552	0.270894	0.9097	0.237272	0
A595	Nist612	512820	36.4516	37.3807	1.01085	3.463	0.241359	0.9077	0.23835	0
		570796	37.3801	37.7875	1.011	3.48331	1.52912	0.907296	0.368515	-3.6285e-18
RM1
B003	GJ1	163942	310.451	27.8412	0.0234882	10.31	1.93288	0.06019	0.521254	4.40774e-16
B053	GJ1	172045	316.133	28.6159	0.0233797	10.22	1.93149	0.06039	0.495506	0
B103	GJ1	168472	306.574	27.7736	0.0234711	10.21	1.9307	0.06032	0.521308	1.32368e-15
B153	GJ1	166110	303.886	27.3901	0.0232367	10.26	1.93362	0.06016	0.546433	4.20302e-16
B203	GJ1	152196	280.206	25.3649	0.022778	10.22	1.93179	0.06027	0.562439	-4.08729e-16
B253	GJ1	163883	308.151	27.864	0.0233798	10.22	1.93636	0.06022	0.519276	-4.41657e-16
B303	GJ1	163384	312.157	28.3316	0.0231643	10.19	1.93332	0.06044	0.52852	4.34615e-16
B353	GJ1	162010	317.157	28.7034	0.0232983	10.21	1.93624	0.06035	0.519331	-4.41639e-16
B403	GJ1	158958	316.832	28.9574	0.0232783	10.11	1.93299	0.06028	0.539592	-4.2577e-16
B453	GJ1	154386	315.405	28.703	0.0233455	10.16	1.93283	0.06028	0.523671	0
B503	GJ1	149175	309.715	28.4322	0.0233002	10.07	1.93766	0.06013	0.523297	1.31391e-15
B553	GJ1	151203	322.096	29.441	0.0230211	10.12	1.93185	0.06031	0.542752	-8.4708e-16
B596	GJ1	147172	317.853	28.7526	0.0232057	10.22	1.93759	0.06025	0.535454	-1.28412e-15
		159457	310.509	28.167	0.0232575	10.1938	1.26781	0.0602762	0.294461	6.48284e-18
RM2
C004	Ttn Mana	235290	182.415	66.5771	4.04528	5.655	1.93526	0.08798	0.483967	4.74149e-16
C054	Ttn Mana	242686	184.77	67.3779	4.08068	5.679	1.94491	0.08784	0.503726	0
C104	Ttn Mana	239640	183.106	65.9538	4.07549	5.741	1.94275	0.08785	0.482631	4.73628e-16
C154	Ttn Mana	238090	179.685	65.5902	4.0766	5.659	1.94291	0.08796	0.48692	4.69418e-16
C204	Ttn Mana	230755	178.203	63.9996	4.04838	5.747	1.94212	0.08795	0.487197	4.69343e-16
C254	Ttn Mana	232031	175.463	64.5693	4.07667	5.625	1.94019	0.08924	0.679605	-3.36798e-16
C304	Ttn Mana	222568	176.734	63.7223	4.0483	5.742	1.93424	0.08839	0.506261	4.53507e-16
C354	Ttn Mana	227218	185.029	67.0319	3.98857	5.702	1.93677	0.08826	0.472994	0
C404	Ttn Mana	221908	185.137	67.3803	4.07718	5.671	1.936	0.08797	0.485922	4.72061e-16
C454	Ttn Mana	214983	186.918	66.9183	4.02582	5.785	1.93611	0.08812	0.482827	-4.7506e-16
C504	Ttn Mana	215367	187.295	68.0812	4.10426	5.672	1.94005	0.0884	0.503322	-4.54791e-16
C554	Ttn Mana	209818	188.068	67.6568	4.06636	5.752	1.93707	0.08793	0.523627	4.37826e-16
C597	Ttn Mana	204275	186.357	66.2313	4.05796	5.82	1.93844	0.08829	0.497513	-4.60483e-16
Anchor						1e-32	1	0.911	0.1	0
		225741	183.014	66.2377	4.05935	5.71154	2.01292	0.0881677	0.855961	1.17139e-16
RM3
D005	Mnz Mana	783651	1544.52	3655.25	64.5061	6.753	2.00638	0.0933	0.623136	0
D055	Mnz Mana	1.04579e+06	1941.52	4764.32	50.6705	5.751	1.94971	0.08255	0.430536	0
D105	Mnz Mana	1.01697e+06	1981.71	4941.84	50.4472	5.682	1.93825	0.07658	0.411131	-5.57288e-16
D155	Mnz Mana	995484	1986.14	4873.91	49.9794	5.767	1.93416	0.07607	0.415971	0
D205	Mnz Mana	1.32828e+06	1885.59	4671.86	52.6154	5.622	2.39961	0.1068	4.08351	2.71924e-16
D255	Mnz Mana	940966	1824.19	4502.31	54.5208	6.042	2.02107	0.08392	0.651358	6.74683e-16
D305	Mnz Mana	1.00037e+06	1937.1	4679.74	52.0138	5.948	1.94763	0.0846	0.447266	5.09797e-16
D355	Mnz Mana	918470	1858.84	4482.79	48.4967	5.972	2.01015	0.08352	0.581969	0
D405	Mnz Mana	942885	2045.11	5134.33	49.8714	5.751	1.93277	0.07692	0.414507	-5.54318e-16
D455	Mnz Mana	884435	1975.98	4913.57	49.8417	5.734	1.94308	0.07628	0.414632	0
D505	Mnz Mana	835190	1941.46	4798.98	52.7293	5.812	1.98204	0.07593	0.422626	0
D555	Mnz Mana	2.3069e+06	2025.06	4280.31	49.6162	5.56	8.04479	0.1992	5.03162	3.51073e-16
D598	Mnz Mana	895547	2085.14	5131.47	49.1979	5.804	1.95178	0.0774	0.421166	0
Anchor						1e-32	0	0.911	1	0
		1.06884e+06	1925.57	4679.28	51.8851	5.86138	10.2502	0.0917746	72.9063	5.35286e-17

## Sheet: Sequence 9
Grain	Sample	207Pba (cps)	Ub (µg/g)	Pbb (µg/g)	Thb/U	238Uc/206Pb	±2s (%)	207Pbc/206Pb	±2s (%)	rhod
U138	MA22-01-04b	1925.79	34.9813	0.130047	0.000804395	976.945	8.05606	0.697533	5.75617	0
U139		2404.66	30.5106	0.158967	0.000565019	727.751	9.38552	0.73599	4.87409	0
U140		3153.52	36.7538	0.187217	0.00015133	925.388	11.0792	0.716812	5.14432	4.9867e-16
U141		2024.11	37.5005	0.128786	0.000527484	1105.84	8.64318	0.742098	5.39409	3.0481e-16
U142		1304.35	34.9277	0.0963594	0.000275576	1156.49	6.48815	0.684063	7.05208	0
U143		1640.68	29.3319	0.1179	0.000635999	884.563	7.38571	0.731218	6.14995	3.12865e-16
U144		1594.28	30.5264	0.111918	0.00149374	878.952	6.59998	0.688407	6.33589	1.69918e-16
U145		1252.09	36.2524	0.0894887	0.000257027	1286.4	6.4408	0.721707	6.66148	-1.65607e-16
U146		1412.13	23.4204	0.107569	0.000781539	707.323	6.3786	0.679155	6.13276	1.81639e-16
U147		1473.03	26.6676	0.101779	0.00125101	850.325	6.6002	0.734458	6.84382	0
U148		1225.95	25.6335	0.091179	0.000902216	874.983	6.13011	0.691815	6.72715	1.72302e-16
U149		988.752	22.8643	0.0807725	0.00065305	881.666	4.86851	0.691406	7.37138	9.89954e-17
U150		1173.9	32.8705	0.0867082	0.000425167	1149.68	5.99922	0.698916	7.08441	0
U157		1150.18	34.8912	0.0916835	8.4139e-05	1156.13	4.83835	0.698254	7.20005	0
U158		1174.37	18.9663	0.0930097	0.000314567	594.498	5.05365	0.679169	7.29202	2.8922e-16
U159		1249.79	27.2137	0.0967934	0.00221909	815.728	5.54105	0.685228	6.9059	-9.28427e-17
U160		883.737	29.7023	0.282889	0.000109728	1251.27	5.96204	0.691068	7.8627	-3.03147e-16
U161		920.131	25.2311	0.0742465	2.69972e-05	1036.8	5.85907	0.677519	8.02623	0
U162		2257.89	20.29	0.177355	0.000716109	370.031	7.24489	0.757441	5.30506	0
U163		1861.09	23.8086	0.133924	0.000503112	604.393	6.68522	0.708297	5.83753	-1.82073e-16
U164		1232.89	24.5208	0.0924449	0.000200014	823.684	6.07144	0.694182	7.41972	3.15458e-16
U165		1316.36	21.0554	0.0963249	0.000547309	693.527	6.35539	0.691765	7.0221	0
U166		1060.33	23.6855	0.0812829	0.000224351	842.38	5.13696	0.685556	6.87486	0
U167		1322.81	22.0268	0.0998391	0.000318693	685.96	5.08854	0.714114	6.49283	1.07531e-16
U168		1113.93	30.6467	0.0832618	2.78255e-05	1166.99	5.70566	0.727089	6.73672	-1.84857e-16
U169		1193.43	33.8348	0.0903694	3.603e-05	1186.83	6.53609	0.699556	7.37448	1.47415e-16
U170		1008.42	37.6864	0.0805604	3.49781e-05	1395	5.24791	0.666393	7.33061	1.84699e-16
U171		3483.1	25.6682	0.222275	0.000207807	475.346	10.002	0.763212	4.85318	0
U172		2622.74	35.0245	0.165282	7.60913e-05	918.257	10.0635	0.762757	5.68022	0
U173		1066.78	19.4621	0.079294	0.000326604	804.989	7.03522	0.705234	8.32488	1.21321e-16
U174	MA22-01-04b (2)	1653.35	50.7623	0.114101	0.000756021	1476.03	7.66684	0.694797	6.53222	-4.25632e-16
U175		5082.09	46.9759	0.318391	0.000988434	606.575	10.2937	0.783783	3.32288	0
U176		2025.31	42.4518	0.138192	0.00132798	1099.14	7.68242	0.705698	5.54808	0
U177		2078.79	43.9908	0.139566	0.00146161	1182.23	7.97748	0.769571	5.17105	0
U178		2337.36	35.7255	0.157809	0.0021412	844.83	8.09666	0.702746	5.61523	0
U179		823.054	31.8675	0.062066	0.00357424	1457.26	5.84415	0.666503	9.28239	0
U180		1202.01	50.0846	0.08889	0.00125085	1740.99	6.07628	0.712334	7.04651	-1.6595e-16
U181		1407.14	47.2903	0.1001	0.00101328	1494.54	6.82147	0.684127	6.69707	0
U182		1075.89	50.6157	0.0833236	0.0004047	1778.58	5.37168	0.683289	7.05299	0
U183		898.002	51.7789	0.0728626	0.000379555	1944.47	4.71931	0.632133	7.04014	0
U184		877.389	51.0065	0.0703377	0.00116586	2113.94	5.35714	0.679433	8.55961	-7.74771e-17
U185		2300.38	43.0473	0.14103	0.000906512	1302.58	8.92616	0.72628	5.5193	0
U186		911.886	50.972	0.0716749	0.000815241	2164.3	5.24592	0.716424	7.57949	-3.57403e-16
U187		798.876	48.3431	0.0666717	0.0018379	2081.93	5.43848	0.640408	9.07989	0
U188		1174.61	47.8194	0.0919979	0.00221752	1514.53	4.7401	0.68347	6.90396	-3.25683e-16
U189		2132.21	44.56	0.147233	0.00328185	1096.36	8.3633	0.704752	5.80451	0
U190		838.667	50.3888	0.0656076	0.000298973	2243.98	5.70976	0.698576	8.59424	1.44799e-16
U191		1646.83	53.4185	0.114796	0.000974344	1642.19	7.15046	0.699872	6.34699	3.13125e-16
U192		5092.41	44.3275	0.303341	0.00351131	685.731	12.2763	0.768783	4.11754	0
U193		1530.82	55.4458	0.110208	0.00312465	1662.16	7.1886	0.686108	6.55792	0
U194		5593.12	58.3578	0.319857	0.00703123	929.194	14.2325	0.751208	4.13983	4.82376e-16
U320	CC2-3 blue	724.959	13.3831	0.138874	0.000232632	264.044	6.07513	0.603476	8.59658	2.72106e-16
U321		1014.63	15.1889	0.182472	0.00134347	253.004	9.10549	0.630144	7.7421	0
U322		930.045	13.5517	0.156853	0.00029804	258.665	7.51289	0.646791	8.21719	1.15096e-16
U323		803.474	8.33602	0.139018	0.000101645	184.522	9.95098	0.629034	15.9063	8.97812e-17
U324		1432.67	16.8933	0.221708	0.000453421	269.179	8.04334	0.64287	7.06597	-2.50041e-16
U325		1065.89	13.0293	0.167544	0.000466562	258.606	7.84067	0.712758	9.49051	-9.54877e-17
U326		1587.63	13.7342	0.26447	0.000304237	168.087	6.47964	0.719624	6.37573	1.71993e-16
U327		660.286	6.31496	0.11138	0.000431251	181.134	8.91468	0.717652	11.2171	-1.42114e-16
U328		1730.87	13.2105	0.253002	0.000686481	213.631	8.6964	0.647435	8.31447	0
U329		1503.53	14.9943	0.25656	0.000372381	195.847	7.19087	0.657786	6.88424	0
U330		1272.2	14.5342	0.198912	0.00033781	251.929	8.3015	0.68729	7.77398	0
U331		902.84	12.4549	0.152863	0.000202992	265.105	7.99836	0.642153	8.7289	0
U332		821.02	5.53624	0.14915	0.000776397	112.992	7.29094	0.743718	9.02974	1.07927e-16
U333		2519.17	20.8315	0.414925	0.00029673	174.603	6.86385	0.758791	4.95008	0
U334		172.21	4.72078	0.0344678	0.000773297	330.728	20.4068	0.450703	38.215	2.18672e-16
U335		1660.6	6.1208	0.306988	0.000543123	64.3358	6.18899	0.746499	5.49218	0
U336		716.443	5.959	0.141201	0.000538833	128.75	7.86938	0.668392	9.48452	-9.51994e-17
U337		1922.18	14.3048	0.342911	0.00029673	136.287	7.01168	0.713611	5.4074	0
U338		386.83	4.70052	0.0746565	0.00069564	195.927	11.0504	0.886781	19.2573	1.3356e-16
U339		1210.15	8.77048	0.228565	0.00105558	123.242	5.73407	0.6902	6.99892	0
U340		1822.65	15.0146	0.32771	0.00067564	148.965	6.37583	0.706465	4.92356	-2.26347e-16
U341		770.141	2.21713	0.14202	0.000631555	48.5311	6.67224	0.732624	9.37615	0
U342		422.724	4.13971	0.0753774	0.000188038	172.124	10.2676	0.785651	15.3646	0
U343		699.2	3.60318	0.122341	0.000339716	92.5969	8.438	0.777133	9.66503	0
U344		729.809	4.5019	0.142874	0.000340797	95.7578	6.54255	0.672124	9.60573	0
U345		733.11	5.97853	0.142035	0.000319894	130.646	6.90115	0.701747	9.06968	2.27042e-16
U346		1084.64	7.72528	0.194357	0.000179881	127.633	6.82682	0.774906	7.35534	1.41504e-16
U347		602.264	1.90499	0.101984	0.000682603	63.1843	8.06823	0.817358	10.2882	-1.71199e-16
U348		376.918	3.22725	0.0727612	0.000159263	144.725	9.35903	0.777882	14.0236	-1.08276e-16
U349		573.905	4.88682	0.104802	5.94628e-05	141.944	7.51164	0.719962	11.2147	-1.68693e-16
U350		554.149	4.68503	0.103377	0.0001894	141.683	9.5221	0.81857	12.1303	-1.23031e-16
U357		918.805	7.37364	0.170001	0.00035276	139.713	7.12793	0.748713	8.00516	-1.24525e-16
U358		706.406	3.72679	0.12026	0.000206148	97.5132	8.55283	0.750516	9.07858	1.83017e-16
U359		631.047	1.85545	0.106129	0.000991155	58.335	9.4849	0.827144	10.7006	0
U360		493.257	3.01777	0.0880175	0.000448499	115.707	8.86852	0.818035	12.2682	1.30613e-16
U361		720.708	6.30681	0.138243	0.000281232	154.224	7.55857	0.748682	9.08927	1.03424e-16
U362		1012.34	5.76117	0.186682	0.000171766	100.423	7.01279	0.758509	7.05965	0
U363		207.935	0.996617	0.0374988	0.00195984	84.97	13.497	0.731801	22.2857	0
U364		1703.49	10.3231	0.285201	0.000413435	126.337	5.88107	0.774174	6.25505	0
U365		1720.81	13.4429	0.29166	0.000459561	154.322	6.58522	0.728653	6.20208	-3.47947e-16
U366		276.229	2.0411	0.0517099	0.000203381	139.224	12.5251	0.714407	17.9033	-1.26747e-16
U367		627.789	4.91271	0.119747	0.000366547	134.081	7.31804	0.740478	10.2213	0
U368		321.375	2.98113	0.0682223	0.000726804	125.326	10.1299	0.651128	16.8994	-3.32052e-16
U369		363.128	2.70937	0.0614024	0.000713432	149.151	11.2421	0.82758	15.5718	-1.62355e-16
U370		642.909	7.16914	0.123173	0.00016716	171.209	6.89102	0.688253	10.1454	-1.01633e-16
U371		128.711	0.473155	0.0226355	0.00393462	54.7252	33.5036	0.616362	46.4891	1.45982e-16
U372		64.1504	0.196652	0.0189899	-0.00148792	21.5572	40.4455	0.305332	84.4509	2.66272e-16
U524	PA23-04-07 blue	32262.3	542.386	2.6711	0.00232465	685.865	2.05918	0.836116	1.4038	3.07255e-16
U525		31892.5	544.438	2.64539	0.00186642	689.814	2.07908	0.82905	1.36656	0
U526		34492	547.046	2.87467	0.00260111	637.894	2.03477	0.828777	1.30136	0
U527		31464.4	562.857	2.6251	0.00111083	715.825	2.07557	0.820115	1.37549	0
U528		32393.8	557.699	2.69354	0.00119127	693.193	2.07243	0.8311	1.27696	0
U529		34472.5	561.087	2.8676	0.00161965	659.633	2.05879	0.831208	1.26913	0
U530		33473.9	564.958	2.78778	0.00108386	677.911	2.09051	0.830172	1.28717	3.30074e-16
U531		32620.7	559.334	2.70646	0.00183709	693.002	2.05378	0.833074	1.33558	0
U532		34074.1	565.074	2.83399	0.00228467	666.545	2.0711	0.824665	1.35951	-3.15441e-16
U533		35066.5	581.739	2.92157	0.00230631	669.731	2.02667	0.832776	1.27496	0
U534		31604	540.555	2.6373	0.00170579	687.491	2.03428	0.830465	1.31771	-3.31337e-16
U535		35686	522.262	2.99468	0.00373577	578.52	2.23904	0.818878	1.27677	-3.1069e-16
U536		39625.3	522.486	3.28678	0.00746835	537.017	2.2776	0.83264	1.16392	-3.35041e-16
U537		30180.9	409.873	2.50516	0.00635049	547.548	2.02573	0.83362	1.35441	0
U538		33916.8	535.526	2.83518	0.00223401	635.887	2.10467	0.831142	1.32069	3.19533e-16
U539		31862.5	543.54	2.65265	0.0014663	690.975	1.99452	0.83618	1.23757	1.79912e-16
U540		31723.9	579.027	2.64033	0.000757814	733.823	2.04444	0.828687	1.33152	0
U541		32091.6	548.054	2.68734	0.00316591	680.918	2.04954	0.823437	1.30722	0
U542		32423.5	623.949	2.72232	0.000469999	759.792	3.10348	0.819717	1.34026	0
U543		32231.6	627.957	2.69116	0.00145342	772.214	2.24512	0.821245	1.33546	0
U544		30947.1	612.362	2.59434	0.000588255	785.954	2.00945	0.82008	1.26814	3.48542e-16
U545		33682.9	601.114	2.82575	0.000425199	707.221	2.35384	0.822714	1.29716	0
U546		31256.4	655.647	2.62467	0.000929339	832.864	2.01481	0.819277	1.26167	0
U547		28796.7	641.692	2.4143	0.000711536	882.483	2.07944	0.823164	1.36541	-3.12819e-16
U548		28796.3	646.556	2.41205	0.00055587	892.528	2.06176	0.824434	1.37713	0
U549		28468.8	641.336	2.40124	0.000752075	877.75	2.02091	0.809037	1.35161	0
U550		28569.8	656.026	2.38991	0.00120991	913.206	2.03747	0.82421	1.38408	0
U551		28286.9	638.325	2.38533	0.00142732	892.444	2.0282	0.821037	1.45176	3.01644e-16
U552		29078.5	703.864	2.44429	0.00155101	963.259	2.07463	0.827543	1.36223	3.14274e-16
U553		29030.1	728.933	2.44465	0.000309454	995.556	2.06278	0.824169	1.40829	0
U554		30669	731.563	2.57177	0.00108524	952.933	2.0937	0.831573	1.44183	-2.94219e-16
U555		30924.1	724.263	2.57619	0.00114465	943.485	2.03076	0.839126	1.29662	0
U556		31968.8	691.958	2.67869	0.000255747	866.759	2.02746	0.833983	1.33755	0
U557		38386.8	683.26	3.23883	0.000401453	703.631	2.01915	0.822204	1.21886	-3.60892e-16
U558		33700.8	768.571	2.82504	0.00073761	901.557	2.08651	0.824687	1.36567	0
U559		43893.9	469.417	3.67243	0.000185595	428.902	2.00913	0.834132	1.17387	0
RM0
A001	NIST612	631184	47.7592	47.176	1.01227	3.569	0.68983	0.9091	0.302283	0
A002	NIST612	387924	28.1383	29.056	1.01638	3.419	0.316164	0.9086	0.301697	-1.45491e-16
A051	NIST612	481668	36.2458	36.8257	1.00472	3.462	0.280947	0.9048	0.241932	-2.04175e-16
A052	NIST612	483190	36.4239	36.9619	1.01013	3.476	0.261959	0.9076	0.255138	-2.0764e-16
A101	NIST612	486295	37.4636	37.8874	1.00931	3.483	0.258415	0.9069	0.261923	0
A102	NIST612	488218	37.5796	38.0997	1.00736	3.475	0.252706	0.9061	0.234833	-2.33854e-16
A151	NIST612	477595	37.2685	37.8203	1.01379	3.475	0.296603	0.9089	0.249729	1.8736e-16
A152	NIST612	477214	37.6579	37.9388	1.00788	3.5	0.289853	0.9053	0.230822	2.07427e-16
A201	NIST612	468114	37.4768	37.7274	1.01136	3.502	0.253232	0.9069	0.257177	0
A202	NIST612	473306	37.5544	38.0948	1.01499	3.469	0.245699	0.9071	0.257625	2.19245e-16
A251	NIST612	459285	37.2218	37.4951	1.01328	3.493	0.315571	0.9063	0.252149	0
A252	NIST612	465107	37.5817	37.98	1.01086	3.492	0.289617	0.9091	0.25972	0
A301	NIST612	460015	37.6589	38.1161	1.01173	3.481	0.308352	0.9066	0.237642	1.89387e-16
A302	NIST612	457378	37.5299	37.8777	1.01322	3.492	0.244196	0.9079	0.250026	0
A351	NIST612	454985	37.6721	38.1372	1.01234	3.481	0.273565	0.9084	0.204258	0
A352	NIST612	456825	37.8302	38.2449	1.01017	3.48	0.293959	0.908	0.236188	-1.99884e-16
A401	NIST612	444342	37.2831	37.735	1.00872	3.483	0.290985	0.9076	0.253492	0
A402	NIST612	447469	37.2921	37.9896	1.01237	3.45	0.277095	0.9063	0.259163	0
A451	NIST612	435120	36.9472	37.4215	1.00566	3.483	0.287094	0.9084	0.243546	0
A452	NIST612	436283	37.2332	37.5999	1.01664	3.491	0.253231	0.9065	0.255051	-2.1487e-16
A501	NIST612	429308	37.1645	37.3579	1.01079	3.513	0.413013	0.91	0.27531	0
A502	NIST612	428265	36.8168	37.3748	1.00472	3.467	0.237495	0.9056	0.263694	-1.10799e-16
A593	NIST612	421960	37.5558	37.8685	1.01593	3.496	0.308079	0.9054	0.25779	1.7474e-16
A594	NIST612	428543	37.766	38.3868	1.00936	3.468	0.252693	0.9081	0.260385	0
		461650	37.3801	37.7989	1.011	3.48333	1.5113	0.907313	0.304143	-1.41065e-17
RM1
B003	GJ-1	150846	411.125	37.7463	0.0223623	10.06	1.82034	0.0601	0.712679	0
B004	GJ-1	145495	397.653	36.4714	0.0219865	10.07	1.8203	0.05984	0.711081	3.4309e-16
B053	GJ-1	149789	416.055	38.1468	0.0226441	10.07	1.82078	0.06006	0.724249	0
B054	GJ-1	149077	416.253	38.1125	0.0222564	10.09	1.82577	0.05991	0.713379	0
B103	GJ-1	150470	430.281	39.2285	0.0227919	10.13	1.82072	0.05992	0.718808	0
B104	GJ-1	149375	428.675	38.9846	0.0223732	10.15	1.8217	0.05982	0.724845	3.36318e-16
B153	GJ-1	150524	444.823	39.7587	0.0228684	10.33	1.8259	0.06022	0.730343	6.66032e-16
B154	GJ-1	150440	439.02	39.7846	0.0224429	10.19	1.82202	0.06004	0.713782	6.82939e-16
B203	GJ-1	147277	441.159	39.7377	0.0229688	10.25	1.82153	0.05989	0.711912	0
B204	GJ-1	145635	430.547	38.9194	0.0224671	10.22	1.82031	0.06031	0.730981	-6.67497e-16
B253	GJ-1	142001	426.205	38.6411	0.0230172	10.19	1.8235	0.06025	0.744951	-6.53832e-16
B254	GJ-1	142569	428.401	38.7522	0.0224764	10.21	1.82237	0.06031	0.708521	-6.87877e-16
B303	GJ-1	143095	435.882	39.4571	0.0230787	10.21	1.82138	0.06029	0.716052	3.40506e-16
B304	GJ-1	142153	434.712	39.0935	0.0225004	10.27	1.8238	0.06042	0.717481	3.39377e-16
B353	GJ-1	139580	431.228	38.8521	0.0227892	10.26	1.82141	0.06038	0.708442	3.44158e-16
B354	GJ-1	139890	433.83	38.9661	0.022553	10.29	1.82234	0.06055	0.724533	-3.36343e-16
B403	GJ-1	138330	432.502	38.9273	0.0226238	10.27	1.82662	0.06056	0.746512	3.25676e-16
B404	GJ-1	137147	431.626	38.8012	0.0224012	10.28	1.8186	0.0603	0.701911	-6.95793e-16
B453	GJ-1	134138	427.889	38.3932	0.0223846	10.3	1.82535	0.0603	0.74172	6.56014e-16
B454	GJ-1	133843	427.685	38.3175	0.0222686	10.31	1.82556	0.06017	0.72191	0
B503	GJ-1	130579	413.767	37.8951	0.0221855	10.09	1.82997	0.06021	0.74242	-9.80614e-16
B504	GJ-1	135339	438.439	39.1746	0.0221922	10.34	1.82214	0.06054	0.716866	-3.39977e-16
B595	GJ-1	124640	404.756	37.2043	0.021937	10.05	1.81965	0.06015	0.743996	3.28029e-16
B596	GJ-1	128814	426.242	38.553	0.0220333	10.21	1.82723	0.05991	0.759771	-3.19885e-16
		141710	427.032	38.6633	0.0224834	10.2017	1.81591	0.0601854	0.750772	-1.332e-17
RM2
C005	Itabe Mz	235628	1969.44	2739.82	59.2205	12.09	1.82029	0.05946	0.67086	0
C006	Itabe Mz	237271	1996.66	2761.32	58.7837	12.13	1.82683	0.05933	0.678642	3.58204e-16
C055	Itabe Mz	227815	1930.35	2748.29	60.7235	11.91	1.8274	0.05902	0.683692	-3.55447e-16
C056	Itabe Mz	234790	2005.53	2800.12	60.361	12.06	1.83625	0.05933	0.685124	0
C105	Itabe Mz	227689	1983.93	2795.9	60.624	12.05	1.83398	0.05923	0.688136	0
C106	Itabe Mz	233996	2055.91	2843.51	59.7194	12.16	1.82517	0.0592	0.673145	-3.61459e-16
C155	Itabe Mz	229190	2000	2813.37	60.5589	12.01	1.82848	0.05989	0.704508	-3.44741e-16
C156	Itabe Mz	355360	2070.6	2907.86	59.8687	11.68	1.83738	0.08747	0.730996	3.3064e-16
C205	Itabe Mz	225645	2022.92	2829.72	60.7957	12.11	1.82745	0.05975	0.677864	-3.58495e-16
C206	Itabe Mz	232171	1982.32	2806.5	60.637	11.94	1.82226	0.06189	0.753812	-3.23293e-16
C255	Itabe Mz	226426	2139.43	2627.94	52.3986	11.89	2.01171	0.06475	0.835873	0
C256	Itabe Mz	225022	2096.99	2873.52	60.0464	12.31	1.8261	0.0593	0.692176	0
C305	Itabe Mz	224268	2083.04	2889.66	60.4578	12.12	1.82694	0.0593	0.686821	3.53917e-16
C306	Itabe Mz	230405	2129.25	2979.6	60.2527	12.06	1.83963	0.05949	0.68172	0
C355	Itabe Mz	220506	2036.64	2874.04	60.8964	12.01	1.83267	0.05986	0.695981	3.48167e-16
C356	Itabe Mz	226593	2136.87	2957.01	60.3015	12.18	1.83295	0.05951	0.707874	-3.42266e-16
C405	Itabe Mz	210140	2013.68	2790.56	60.6679	12.27	1.82532	0.05973	0.695549	3.49787e-16
C406	Itabe Mz	217572	2075.55	2912.52	60.7163	12.18	1.84015	0.05953	0.697845	0
C455	Itabe Mz	209023	2044.23	2774.3	59.133	12.36	1.82589	0.05964	0.701631	0
C456	Itabe Mz	214938	2059.6	2850.63	59.8443	12.17	1.84436	0.06022	0.69522	3.46339e-16
C505	Itabe Mz	208941	2040.26	2850.92	60.2187	12.21	1.83409	0.05988	0.702619	0
C506	Itabe Mz	217090	2142.67	2935.51	58.9934	12.25	1.82927	0.05944	0.68476	0
C597	Itabe Mz	213991	2151.75	2994.67	59.0305	12.13	1.84866	0.05938	0.712954	0
Anchor						1e-32	0	0.87	2	0
		229760	2050.77	2841.62	59.75	12.0991	2.49943	0.0610696	19.2558	5.88096e-20
