# Supplementary material for: U-Pb dating of chrysocolla from supergene copper deposits in the Coastal Cordillera of northern Chile, Atacama Desert
Source: Copernicus journal article supplement (doi:10.5194/egusphere-2025-4801), 2025-10-14
Supplement: Supplementary file 3 [file Metadata sequence.xlsx]

## Sheet: Sequence 6
	LA-ICP-MS U-Th-Pb data report
	Laboratory & Sample Preparation
	Laboratory name	FIERCE, Frankfurt Isotope & Element Research Center GUF, Goethe Univesity Frankfurt
	Sample type/mineral	Chrysocolla
	Sample preparation	25 mm polished resin mounts
	Imaging	Petrographic microscope & 2400 dpi digital scan
	Laser ablation system
	Make, Model & type	RESOlution ArF excimer laser (COMpex Pro 102)
	Ablation cell	Two-volume ablation cell (Laurin Technic S155)
	Laser wavelength	193 nm
	Pulse width	20 ns
	Fluence	~ 2.5 J/cm2
	Repetition rate	8 Hz
	Pre-ablation	25 pulses (same parameters as main ablation)
	Ablation duration	25 s
	Ablation rate	~ 0.6 μm/s
	Spot shape & size	50 µm (diameter)
	Sampling mode	Static spot ablation
	Gasses	Sample cell: He. Funnel: He + Ar. Tubbing: He + Ar + N
	Gas flows	He (300 ml/min), Ar (1100 ml/min), N (7 ml/min).
	ICP-MS Instrument
	Make, Model & type	ThermoScientific ElementXr sector field ICP-MS
	Sample introduction	Ablation aerosol
	RF power	1270 W
	Detection system	Secondary electron multiplier (with conversion dynode at -8kV). Simultaneous analogue and counting (pulse) modes of detection (conversion factors calculated per mass and applied offline). Magnetic field fixed. Detection by peak jumping with electrostatic analyzer.
	Masses measured	206, 207, 208, 232, 235, 238
	Dwell times	206: 4 ms, 207: 5.5 ms, 208: 1 ms, 232: 1 ms, 235: 1.5 ms, 238: 2 ms
	Samples per peak / integration type	(206: 9, 207: 9, 208: 7, 232: 7, 235: 9, 238: 9) / average
	Total time per run	0.137 s
	Number of runs / total time	330 / 45.309 s
	Acquisition mode	Trigger from laser (20 s after pre-ablation), background: 20 s, ablation: 25 s
	Dead time	21 ns
	Data Processing
	Gas blank	20 s on-peak zero subtracted.
	Calibration strategy	- Primary RM: Gls- NIST612 - Validation RM: Zrn- GJ1, Ttn- Nama, Mz- Nama
	Reference Material (RM) information
	Data processing / LIEF correction	In-house VBA spreadsheet program (Gerdes and Zeh, 2006, 2009). No LIEF correction applied.
	Mass discrimination	²⁰⁷Pb/²⁰⁶Pb (1%) and ²⁰⁶Pb/²³⁸U (14.26%) normalised to primary RM.Matrix offset (calculated from offset RM): 0.86
	Common-Pb correction	No common-Pb correction applied to the data.
	Uncertainty level & propagation	Uncertainties are quoted at 2s absolute and are propagated by quadratic addition of the within run precision, counting statistics, background, common Pb correction (if applicable) and the excess of scatter (calculated from the primary RM). In addition, an excess of variance of 1.14 % (1s), calculated from the offset RM, was added quadratically to the Pb/U ratios. Systematic uncertainties are repo…
	Other information

## Sheet: Sequence 8
	LA-ICP-MS U-Th-Pb data report
	Laboratory & Sample Preparation
	Laboratory name	FIERCE, Frankfurt Isotope & Element Research Center GUF, Goethe Univesity Frankfurt
	Sample type/mineral	Chrysocolla
	Sample preparation	25 mm polished resin mounts
	Imaging	Petrographic microscope & 2400 dpi digital scan
	Laser ablation system
	Make, Model & type	RESOlution ArF excimer laser (COMpex Pro 102)
	Ablation cell	Two-volume ablation cell (Laurin Technic S155)
	Laser wavelength	193 nm
	Pulse width	20 ns
	Fluence	~ 2.5 J/cm2
	Repetition rate	8 Hz
	Pre-ablation	25 pulses (same parameters as main ablation)
	Ablation duration	25 s
	Ablation rate	~ 0.6 μm/s
	Spot shape & size	50 µm (diameter)
	Sampling mode	Static spot ablation
	Gasses	Sample cell: He. Funnel: He + Ar. Tubbing: He + Ar + N
	Gas flows	He (300 ml/min), Ar (1100 ml/min), N (7 ml/min).
	ICP-MS Instrument
	Make, Model & type	ThermoScientific ElementXr sector field ICP-MS
	Sample introduction	Ablation aerosol
	RF power	1270 W
	Detection system	Secondary electron multiplier (with conversion dynode at -8kV). Simultaneous analogue and counting (pulse) modes of detection (conversion factors calculated per mass and applied offline). Magnetic field fixed. Detection by peak jumping with electrostatic analyzer.
	Masses measured	206, 207, 208, 232, 235, 238
	Dwell times	206: 4 ms, 207: 5.5 ms, 208: 1 ms, 232: 1 ms, 235: 1.5 ms, 238: 2 ms
	Samples per peak / integration type	(206: 9, 207: 9, 208: 7, 232: 7, 235: 9, 238: 9) / average
	Total time per run	0.137 s
	Number of runs / total time	330 / 45.309 s
	Acquisition mode	Trigger from laser (20 s after pre-ablation), background: 20 s, ablation: 25 s
	Dead time	21 ns
	Data Processing
	Gas blank	20 s on-peak zero subtracted.
	Calibration strategy	- Primary RM: Gls- NIST612 - Validation RM: Zrn- GJ1, Ttn- Nama, Mz- Nama
	Reference Material (RM) information
	Data processing / LIEF correction	In-house VBA spreadsheet program (Gerdes and Zeh, 2006, 2009). No LIEF correction applied.
	Mass discrimination	²⁰⁷Pb/²⁰⁶Pb (0.83%) and ²⁰⁶Pb/²³⁸U (13.47%) normalised to primary RM.Matrix offset (calculated from offset RM): 0.96
	Common-Pb correction	No common-Pb correction applied to the data.
	Uncertainty level & propagation	Uncertainties are quoted at 2s absolute and are propagated by quadratic addition of the within run precision, counting statistics, background, common Pb correction (if applicable) and the excess of scatter (calculated from the primary RM). In addition, an excess of variance of 0.62 % (1s), calculated from the offset RM, was added quadratically to the Pb/U ratios. Systematic uncertainties are repo…
	Other information

## Sheet: Sequence 9
	LA-ICP-MS U-Th-Pb data report
	Laboratory & Sample Preparation
	Laboratory name	FIERCE, Frankfurt Isotope & Element Research Center GUF, Goethe Univesity Frankfurt
	Sample type/mineral	Chrysocolla
	Sample preparation	25 mm polished resin mounts
	Imaging	Petrographic microscope & 2400 dpi digital scan
	Laser ablation system
	Make, Model & type	RESOlution ArF excimer laser (COMpex Pro 102)
	Ablation cell	Two-volume ablation cell (Laurin Technic S155)
	Laser wavelength	193 nm
	Pulse width	20 ns
	Fluence	2 J/cm2
	Repetition rate	6 Hz
	Pre-ablation	80 pulses (same parameters as main ablation)
	Ablation duration	22 s
	Ablation rate	~ 0.6 μm/s
	Spot shape & size	50 µm (diameter)
	Sampling mode	Static spot ablation
	Gasses	Sample cell: He. Funnel: He + Ar. Tubbing: He + Ar + N
	Gas flows	He (300 ml/min), Ar (970 ml/min), N (6 ml/min).
	ICP-MS Instrument
	Make, Model & type	ThermoScientific ElementXr sector field ICP-MS
	Sample introduction	Ablation aerosol
	RF power	1220 W
	Detection system	Secondary electron multiplier (with conversion dynode at -8kV). Simultaneous analogue and counting (pulse) modes of detection (conversion factors calculated per mass and applied offline). Magnetic field fixed. Detection by peak jumping with electrostatic analyzer.
	Masses measured	206, 207, 208, 232, 235, 238
	Dwell times [ms]	206: 3.2, 207: 4.8, 208: 1.5, 232: 0.8, 235: 0.6, 238: 2.0
	Samples per peak / integration type	206: 10, 207: 10, 208: 10, 232: 6, 235: 6, 238: 10 / average
	Total time per run	0.143 s
	Number of runs / total time	300 / 42.798 s
	Acquisition mode	Trigger from laser (20 s after pre-ablation), background: 19 s, ablation: 22 s
	Dead time	19 ns
	Data Processing
	Gas blank	20 s on-peak zero subtracted.
	Calibration strategy	- Primary RM: Gls- NIST612 - Offset RM: Zrn- GJ1, Mz - Itabe
	Reference Material (RM) information
	Data processing / LIEF correction	In-house VBA spreadsheet program (Gerdes and Zeh, 2006, 2009). Intercept method for LIEF correction.
	Mass discrimination	²⁰⁷Pb/²⁰⁶Pb (0.89%) and ²⁰⁶Pb/²³⁸U (15.68%) normalised to primary RM.Matrix offset (calculated from Mz Itabe RM): 0.89
	Common-Pb correction	No common-Pb correction applied to the data.
	Uncertainty level & propagation	Uncertainties are quoted at 2s absolute and are propagated by quadratic addition of the within run precision, counting statistics, background, common Pb correction (if applicable) and the excess of scatter (calculated from the primary RM). In addition, an excess of variance of 0.61 % (1s), calculated from the offset RM, was added quadratically to the 206Pb/238U ratios. Systematic uncertainties ar…
	Other information
