# Supplementary material for: U-Pb dating of chrysocolla from supergene copper deposits in the Coastal Cordillera of northern Chile, Atacama Desert
Source: Copernicus journal article supplement (doi:10.5194/egusphere-2025-4801), 2025-10-14
Supplement: Supplementary file 5 [file Sampling sites.xlsx]

## Sheet: Hoja1
Point	Latitude	Longitude	Height
Michilla
MI1	-22.7837	-70.2722	396
MI2	-22.7838	-70.2716	418
MI3	-22.7837	-70.2712	432
MI5	-22.7859	-70.2704	441
MI6	-22.7857	-70.2697	476
MI8	-22.8226	-70.2322	1292
MI9	-22.8248	-70.2028	1064
MI23-01a	-22.8179	-70.2277	1175
MI23-01b	-22.8173	-70.227	1154
MI23-01c	-22.8175	-70.2263	1144
MI23-01d	-22.8183	-70.2251	1124
MI23-02	-22.8038	-70.2309	1187
MI23-03	-22.8226	-70.2322	1292
MI23-04a	-22.8362	-70.2364	1361
MI23-04b	-22.836	-70.2373	1387
MI23-04c	-22.8348	-70.2391	1367
MI23-05	-22.8299	-70.2446	1269
MI23-06	-22.8282	-70.2415	1286
MI23-07a	-22.8279	-70.2381	1384
MI23-07b	-22.8285	-70.2382	1376
MI23-07d	-22.8294	-70.239	1361
MI23-07f	-22.8311	-70.2402	1328
Marimaca
MA22-01	-23.1861	-70.2169	1101
MA22-02	-23.1932	-70.2204	1032
Caleta El Cobre
CC01-01	-24.2168	-70.4687	858
CC22-02	-24.1824	-70.4831	741
CC22-03a	-24.2605	-70.4486	1580
CC22-03b	-24.2605	-70.4486	1565
CC22-03c	-24.2524	-70.4545	1465
CC22-03d	-24.2675	-70.4496	1404
CC22-04a	-24.2136	-70.474	906
CC22-04b	-24.2149	-70.4733	940
CC22-04d	-24.2222	-70.4708	1102
CC22-04e	-24.2168	-70.4681	890
CC22-04f	-24.2145	-70.4715	836
CC22-04g	-24.2153	-70.4664	813
CC22-05a	-24.1967	-70.4774	684
CC22-05b	-24.197	-70.4777	674
CC22-06	-24.2011	-70.4702	821
CC22-07	-24.2127	-70.4953	451
CC22-08	-24.2398	-70.4909	864
Paposo
MP1	-24.8947	-70.2762	2025
MP2	-24.8953	-70.2764	2032
MP3	-24.8968	-70.2786	2015
MR1	-24.9799	-70.4	1141
PA23-01a	-24.8945	-70.2835	1948
PA23-01b	-24.8989	-70.2753	2138
PA23-01c	-24.8973	-70.276	2084
PA23-01d	-24.8961	-70.276	2071
PA23-02a	-24.9951	-70.4012	1155
PA23-02b	-24.9943	-70.4004	1183
PA23-02c	-24.9947	-70.4001	1175
PA23-02d	-24.9967	-70.4015	1175
PA23-03	-24.9951	-70.4074	997
PA23-04a	-25.0076	-70.3973	1047
PA23-04b	-25.0082	-70.3969	1026
PA23-04c	-25.0073	-70.3982	1040
PA23-05	-24.982	-70.3992	1135
